1 **Bsc2 is a novel regulator of triglyceride lipolysis that demarcates a lipid droplet**  
2 **subpopulation**

3

4 **Authors:** Natalie Ortiz Speer<sup>1</sup>, R. Jay Braun<sup>2</sup>, Emma Grace Reynolds<sup>1</sup>, Jessica M.J.  
5 Swanson<sup>2</sup>, W. Mike Henne<sup>1</sup>

6

7 \*correspondence: [mike.henne@utsouthwestern.edu](mailto:mike.henne@utsouthwestern.edu)

8

9 **Affiliations:**

10 <sup>1</sup>Department of Cell Biology, UT Southwestern Medical Center, Dallas, TX 75390, USA

11 <sup>2</sup>Department of Chemistry, University of Utah, Salt Lake City, UT 84112, USA

12

13 **Abstract:**

14 Cells store lipids in the form of triglyceride (TG) and sterol-ester (SE) in lipid droplets  
15 (LDs). Distinct pools of LDs exist, but a pervasive question is how proteins localize to  
16 and convey functions to LD subsets. Here, we show the yeast protein Bsc2 localizes to  
17 a subset of TG-containing LDs, and reveal it negatively regulates TG lipolysis.  
18 Mechanistically, Bsc2 LD targeting requires TG, and LD targeting is mediated by  
19 hydrophobic regions (HRs). Molecular dynamics simulations reveal these Bsc2 HRs  
20 interact with TG on modeled LDs, and adopt specific conformations on TG-rich LDs  
21 versus SE-rich LDs or an ER bilayer. Bsc2-deficient yeast display no defect in LD  
22 biogenesis, but exhibit elevated TG lipolysis dependent on lipase Tgl3. Remarkably,  
23 Bsc2 abundance influences TG, and over-expression of Bsc2, but not LD protein Pln1,  
24 promotes TG accumulation without altering SE. Finally, we find Bsc2-deficient cells  
25 display altered LD mobilization during stationary growth. We propose Bsc2 regulates  
26 lipolysis and localizes to subsets of TG-enriched LDs.

27

28 **Key words:**

29 Lipid droplet (LD); triglyceride (TG); sterol-ester (SE); lipolysis; molecular dynamics  
30 simulation; LD protein targeting

31

32 **Introduction:**

33 Lipid droplets (LDs) are fat storage organelles comprised of a neutral lipid core  
34 containing both triglycerides (TG) and sterol esters (SE) (Walther et al., 2017). Distinct  
35 from bilayer-bound organelles, LDs are surrounded by a phospholipid (PL) monolayer  
36 which is decorated with surface proteins that aid in their biogenesis and degradation  
37 (Currie et al., 2014). These cytosolic lipid reservoirs can be made or broken down in  
38 response to a variety of metabolic cues, such as nutrient deprivation or increased  
39 membrane biogenesis. Defects in lipid storage in LDs contribute to numerous metabolic  
40 disorders including obesity, cardiovascular disease, and diabetes (Welte, 2015;  
41 Gluchowski et al., 2017). Recent studies indicate that beyond their role in lipid storage,  
42 LDs also play important roles in signaling and protein homeostasis (Li et al., 2012;  
43 Bersuker et al., 2018; Schmeisser et al., 2019). Despite this, it remains unclear if distinct  
44 pools of LDs exist within cells to enable this functional diversity. Work from our group  
45 and others have shown that LDs are not homogenous within the context of a single cell,  
46 but exist in a variety of subpopulations that contain distinct proteomes and/or  
47 morphologies (Zhang et al., 2016; Eisenberg-Bord et al., 2018; Teixeira et al., 2018;  
48 Schott et al., 2019; Ugrankar et al., 2019). Although LDs exhibit these unique features,  
49 little is currently known regarding how such differences dictate LD function. LD  
50 subpopulations are of particular interest to the field of metabolism as there is mounting  
51 evidence that different LD pools play roles in maintaining metabolic homeostasis in  
52 response to various nutrient states (Hariri et al., 2018; Eisenberg-Bord et al., 2018;  
53 Teixeira et al., 2018). For example, large and small LD pools observed in human  
54 hepatocytes are mobilized by mechanistically distinct pathways during starvation  
55 (Schott et al., 2019). Similarly, *Drosophila* fat body cells contain two subpopulations of  
56 LDs that are differentially maintained by extracellular and *de novo* synthesis of lipids  
57 (Ugrankar et al., 2019).

58

59 LD turnover primarily occurs through a highly conserved process known as lipolysis.  
60 This catabolic process involves the targeting of cytoplasmic lipases to LDs where they  
61 hydrolyze TG and SE to base components. TG breakdown via lipolysis is necessary for  
62 maintaining lipid homeostasis, sustaining membrane biosynthesis, and promoting



63 cellular division across multiple species (Duncan et al., 2007; Schmidt et al., 2014;  
64 Heier and Kühnlein, 2018). However, the underlying mechanisms for regulation of TG  
65 lipolysis in budding yeast are poorly understood. Yeast contain three LD-resident and  
66 paralogous TG lipases: Tgl3, Tgl4, and Tgl5 (Athenstaedt et al., 1999; Athenstaedt and  
67 Daum, 2003, 2005; Kurat et al., 2006). Although Tgl4 has been shown to be the  
68 functional ortholog of the mammalian TG lipase, ATGL, in yeast, it is in fact Tgl3 that  
69 performs the bulk of the lipolytic activity *in vivo* as it can hydrolyze TG species of  
70 variable fatty acid chain length (Athenstaedt and Daum, 2003, 2005; Kurat et al., 2006).  
71 The regulation of Tgl3-mediated TG lipolysis is poorly understood. Previous studies  
72 provide some insight by demonstrating that in the absence of either TG or LDs as  
73 whole, Tgl3 activity, targeting, and stability is negatively impacted, a common trait for  
74 many resident LD proteins (Schmidt et al., 2013; Koch et al., 2014). In LD-null yeast,  
75 Tgl3 is re-targeted to the ER where it loses its lipolytic activity and is rapidly degraded  
76 (Schmidt et al., 2013). In spite of this information, specific regulators of Tgl3 TG lipase  
77 activity remain unidentified. Whether specific LD subsets are preferentially mobilized  
78 during metabolic cues is also underexplored.

79  
80 Here, we deorphanize and characterize the LD protein Bsc2 as a negative regulator of  
81 TG lipolysis in yeast. We show that Bsc2 enriches on a subpopulation of LDs at  
82 logarithmic (LOG) phase yeast growth. We find Bsc2 LD targeting is dependent on the  
83 presence of TG, as Bsc2 fails to stably localize to SE-LDs. Structure-function analysis  
84 reveals the N-terminal half of Bsc2, containing distinct hydrophobic domains, is  
85 necessary for stable LD association. This is supported by molecular dynamics (MD)  
86 simulations that demonstrate Bsc2 adopts a distinct conformational ensemble on TG-  
87 rich LDs and interacts extensively with TG in addition to LD monolayer PLs.  
88 Physiologically, loss of Bsc2 (*bsc2Δ*) generates a significant decrease in steady-state  
89 TG during yeast LOG phase growth. We show this decrease is not due to reduced TG  
90 synthesis, but rather from upregulated Tgl3-dependent TG lipolysis. Notably, Bsc2 over-  
91 expression promotes TG accumulation and LD enlargement in yeast, but does not alter  
92 SE pools. We propose that Bsc2 demarcates a LD subpopulation, where it locally  
93 inhibits Tgl3-dependent TG lipolysis.

94

95 **Results:**

96 ***Bsc2 localizes to a LD subset and requires TG for LD targeting***

97 To dissect how proteins target to specific lipid droplets (LD) subpopulations, we used a  
98 candidate-based approach to image GFP-tagged proteins annotated to localize to LDs  
99 in the budding yeast *Saccharomyces cerevisiae*. We manually imaged yeast expressing  
100 these chromosomally GFP-tagged proteins and co-expressing the canonical LD protein  
101 Erg6-mRuby, a previously established LD marker known to decorate all yeast LDs  
102 (Müllner et al., 2004). Candidate-based imaging revealed that Bsc2-GFP, a canonical  
103 LD targeting protein of unknown function, was detected on only a subset of Erg6-mRuby  
104 labeled LDs in yeast growing at logarithmic (LOG) phase (**Fig 1A**). Similarly, LOG-  
105 phase yeast expressing Bsc2-GFP and stained with the general LD dye  
106 monodansylpentane (MDH) also showed partial MDH and Bsc2-GFP co-localization  
107 (**Fig 1C**). Consistent with this, previous work also determined that Bsc2 was among a  
108 few LD proteins detected on only LD subsets in budding yeast (Eisenberg-Bord et al.,  
109 2018; Teixeira et al., 2018). To determine whether Bsc2-GFP decorated a LD subset in  
110 yeast in different growth phases, we also imaged yeast grown into stationary (STAT)  
111 phase, when cell growth slows and LD lipid storage is elevated. STAT phase yeast also  
112 exhibited detectable Bsc2-GFP on LDs, but this Bsc2-GFP signal colocalized closely  
113 with Erg6-mRuby (**Fig 1A**). Quantification of this Bsc2-GFP/Erg6-mRuby colocalization  
114 in LOG and STAT phases revealed that in LOG phase, only ~40% of Erg6-mRuby LDs  
115 also exhibited detectable Bsc2-GFP (**Fig 1B**). In STAT phase this detectable co-  
116 localization increased to ~70%, suggesting Bsc2-GFP and Erg6-mRuby colocalization  
117 increased in STAT phase.

118

119 Recent work indicates that LD neutral lipid composition can influence protein targeting  
120 to the LD surface (Thiam and Beller, 2017; Chorlay and Thiam, 2020; Caillon et al.,  
121 2020; Dhiman et al., 2020). Since yeast LDs contain TG and SE, we next dissected  
122 whether loss of either of these neutral lipids influenced Bsc2-mNeonGreen (Bsc2-mNG)  
123 LD localization. We generated a chromosomally-tagged Bsc2-mNG yeast strain that  
124 produced only TG (TG-only) by deleting the genes encoding the two SE-generating

125 enzymes Are1 and Are2, and a strain producing only SEs (SE-only) by deleting the TG-  
126 synthesis enzymes Dga1 and Lro1 (Sandager et al., 2002; Sorger et al., 2004). Imaging  
127 revealed that whereas the wildtype (WT) and TG-only yeast exhibited Bsc2-mNG that  
128 co-localized with a subset of LDs, the SE-only yeast contained very dim Bsc2-mNG  
129 signal that was nearly undetectable on LDs (**Fig 1D**). This suggests that TG is  
130 necessary for Bsc2-mNG LD targeting, and potentially for Bsc2-mNG protein stability.

131

### 132 ***The Bsc2 N-terminal hydrophobic regions mediate LD targeting***

133 Proteins can target to LDs through amphipathic or hydrophobic motifs that interact with  
134 or insert into the LD PL monolayer (Bacle et al., 2017; Prévost et al., 2018; Chorlay and  
135 Thiam, 2020; Chorlay et al., 2021). To mechanistically dissect how Bsc2 targets to LDs,  
136 we examined its hydrophobicity using Phobius (Käll et al., 2004) (**Fig 2A**). The  
137 hydrophobicity plot predicted two hydrophobic regions in the N-terminal half of Bsc2,  
138 which we denote as Hydrophobic Region 1 (HR1) and Hydrophobic Region (HR2). Bsc2  
139 also contains a predicted Low Complexity Region (LCR) directly downstream of these  
140 HRs. We hypothesized that Bsc2 targets to LDs through the action of either HR1, HR2,  
141 or both regions. To test this, we generated seven mNG-tagged fragments of Bsc2, and  
142 over-expressed them in yeast stained for LDs in LOG phase growth (**Fig 2B**).  
143 Interestingly, full length Bsc2 (Bsc2<sup>FL</sup>) targeted both LDs and the endoplasmic reticulum  
144 (ER) when over-expressed. Similarly, a truncated fragment removing the LCR (Bsc2<sup>N-  
145 HR1+HR2</sup>) also showed this LD and ER dual-targeting, as did a smaller fragment only  
146 containing the HR1 and HR2 regions (Bsc2<sup>HR1+HR2</sup>), suggesting the LCR and N-terminal  
147 region (Bsc2<sup>N</sup>) preceding HR1 are not necessary for this LD/ER localization.

148

149 Next we dissected how HR1 and HR2 influence Bsc2 localization to the ER network and  
150 LDs. A construct encoding only the N-terminal region and HR1 (Bsc2<sup>N-HR1</sup>) localized to  
151 LDs, suggesting HR1 may be sufficient for LD targeting (**Fig 2B**). In support of this,  
152 amino acid and secondary structure analysis of HR1 indicates it forms a predicted  
153 alpha-helical fold, with several hydrophobic amino acids on one face, commonly  
154 observed in LD targeting motifs (**Fig 2A**). A smaller construct retaining HR1 without the  
155 preceding N-terminal region (Bsc2<sup>HR1</sup>) failed to express well in yeast, suggesting the

156 initial N-terminal region may be necessary for HR1 stability. Surprisingly, a construct  
157 encoding only HR2 (Bsc2<sup>HR2</sup>) localized primarily to the ER network surrounding the  
158 nucleus and peripheral ER (**Fig 2B**). No detectable LD localization was detected for  
159 Bsc2<sup>HR2</sup>, indicating HR1 was necessary for detectable LD targeting. Since HR1  
160 appeared to mediate the Bsc2 LD interaction, we generated a chimeric Bsc2 construct  
161 where we replaced HR1 with LiveDrop (Bsc2<sup>LiveDrop</sup>), a known LD targeting module  
162 derived from the LD targeting motif of *Drosophila* GPAT4 (Wilfling et al., 2013; Wang et  
163 al., 2016). Indeed, Bsc2<sup>LiveDrop</sup> targeted to LDs as well as the ER network when over-  
164 expressed in yeast, and appeared similar to Bsc2<sup>FL</sup>, suggesting LiveDrop could replace  
165 HR1 for organelle targeting (**Fig 2B**).

166  
167 Bsc2 LD targeting could, in principle be due to direct insertion or interaction with the LD  
168 surface monolayer, or through binding another LD surface protein. To delineate these  
169 possibilities, we expressed yeast Bsc2-GFP in human U2-OS cells treated with oleic  
170 acid (OA) to induce LD biogenesis. Bsc2-GFP decorated the surfaces of LDs in U2-OS  
171 cells, suggesting it was able to localize to the LD surface independent of other yeast  
172 proteins (**Fig 2C**). Collectively, this supports a model where Bsc2 interacts directly with  
173 the LD surface.

174  
175 **Molecular dynamics simulations suggest Bsc2 HRs adopt specific conformations**  
176 **on TG-rich LDs**

177 To better understand the interaction between Bsc2 and LDs, molecular dynamics (MD)  
178 simulations were conducted with Bsc2<sup>N-HR1+HR2</sup> (residues 1-100) interacting with a TG-  
179 rich LD (TG-only), a SE-rich LD (90:10 ratio of cholesteryl oleate (CHYO) to TG), and an  
180 ER bilayer. The structure of Bsc2<sup>N-HR1+HR2</sup> was first predicted with RoseTTAFold (Baek  
181 et al., 2021) and AlphaFold2 (Jumper et al., 2021), both of which predicted an alpha-  
182 helix for HR1, and a hairpin (helix-kink-helix) conformation for HR2. TOPCONS  
183 (Tsirigos et al., 2015) and TM AlphaFold (Dobson et al., 2023) also predicted a  
184 membrane-embedded topology for the hydrophobic HR2 sequence (**Fig S3M**). Although  
185 they were very similar, the RoseTTAFold structure was selected for further simulations

186 as it has been demonstrated to better predict membrane structures (Azzaz et al., 2022;  
187 Hegedűs et al., 2022).

188

189 The membrane embedded systems were set up with the HR2 hairpin inserted into each  
190 respective lipidic environment deep enough to enable the charged residues on the ends  
191 (Arg61, Asp90, Asp93, Arg100) to be surface oriented where they can interact with the  
192 charged lipid headgroups and water (**Fig 3A, Fig S3C**). The HR1 region was positioned  
193 5 angstroms above the membrane PL to allow for membrane association between the  
194 amphipathic region and membrane packing defects (see Methods). Long timescale  
195 simulations were run on Anton2 provided by Pittsburg Supercomputing Center (Shaw et  
196 al., 2014), yielding 4.5 microseconds of simulations for the TG-only LD and ER bilayer  
197 systems. The 90:10 CHYO:TG LD system was run for 1 microsecond on EXPANSE  
198 provided by San Diego Supercomputing Center (Strande et al., 2021).

199

200 Simulations revealed clear conformational changes in Bsc2 between the LD and bilayer  
201 environments (**Fig 3A, Fig S3A-C**). In both the TG-only and 90:10 CHYO:TG LDs, HR2  
202 orients with the predicted helix-kink-helix angle of approximately  $100^\circ$ , then decreases  
203 to an angle of  $70^\circ$ , as the kink region engages with the TG core (**Fig S3A-C**). In  
204 contrast, in the ER bilayer the helix-kink-helix region opens to an average angle of  $150^\circ$ ,  
205 bringing the residues in the kink region closer to the PL surface (**Fig 3A**). A central  
206 driving force for this conformational change is the stabilization of polar residues Gln72,  
207 Cys75 and Ser76 near the kink of HR2. In the LDs, these residues interact with TG  
208 glycerol groups 2.0-2.5nm below the headgroup phosphates (**Fig 3B, C, Fig S3D**). In  
209 the ER bilayer, stabilization at this depth is not possible as it places the polar residues in  
210 the hydrophobic tail region of the PLs (**Fig S3E, F**). By splaying open, the kink region  
211 rises closer to the lipid head-groups, enabling polar interactions with the PL-glycerols  
212 ~1-1.2nm below the phosphate plane. Thus, HR2 obtains a kinked conformation in the  
213 LD monolayers, but a splayed open conformation in the ER bilayer.

214

215 The Bsc2 HR1 amphipathic helix embeds well in the packing defects of both the TG-rich  
216 LD and the ER bilayer (**Fig 3A**). The hydrophobic residues along the bottom of HR1

217 interact with both PL and TG acyl tails, while the charged and polar residues along the  
218 top stabilize the HR1 helix via hydrogen bonds with the PL headgroups and water.  
219 Strikingly, this is not the case for the 90:10 CHYO: TG LD. Here the HR1 helix fails to  
220 associate with the monolayer, and instead folds over on itself to maintain some degree  
221 of amphipathic interactions (**Fig 3A, right**). The reason for this discrepancy is  
222 insufficient lipid packing defects in the SE-rich LD to adequately absorb the HR1  
223 hydrophobic moieties (**Fig 3A, Fig S3H-J**). Importantly, the amphipathic helix HR1  
224 associates well with the TG-rich LD and ER bilayer, but fails to associate at all with the  
225 SE-rich LD.

226  
227 Based on these simulations, the driving force for Bsc2 LD targeting is likely a  
228 combination of the Bsc2 HR1 and HR2 sequences working together. Due to its  
229 drastically different confirmation on TG-rich versus SE-rich (90:10 CHYO: TG) LDs, it is  
230 possible that HR1 may act as a ‘sensor’, detecting the numerous packing defects found  
231 on TG-rich LDs preferentially over SE-rich LDs and the ER bilayer. HR1 itself also  
232 interacts with the glycerol backbones of several TG molecules in the TG-rich LD  
233 system. Indeed, TG-rich LDs have been shown to have larger and longer-lived packing  
234 defects than the ER bilayer, with TG-LDs and ER-bilayers maintaining a packing defect  
235 constant of  $27\text{\AA}^2$  and  $16\text{\AA}^2$ , respectively (Kim et al., 2021; Braun and Swanson, 2022).  
236 This discrepancy is even more pronounced for the SE-rich LD, which has a more  
237 densely packed PL monolayer with very few packing defects, maintaining a defect  
238 constant of  $14\text{\AA}^2$  (Braun and Swanson, 2022). Collectively, the preferential targeting of  
239 HR1 to TG-enhanced packing defects would potentially explain why the over-expressed  
240 Bsc2<sup>N-HR1</sup> fragment localizes to LDs, and also provides a potential molecular  
241 explanation for why Bsc2 localizes to TG-rich LDs, but appears significantly less  
242 detectable on SE-rich LDs *in vivo*.

243  
244 The hydrophobic HR2 segment seems to embed in either the ER bilayer or LD  
245 monolayers. We hypothesize that in the absence of HR1, HR2 likely remains in the ER,  
246 kinetically trapped in an interfacial conformation, as observed when Bsc2<sup>HR2</sup> is over-  
247 expressed in yeast. However, in the presence of HR1, HR2 may fold into a more stable



248 kinked conformation once the polar residues (Gln72, Cys75, Ser76) gain access to the  
249 glycerol groups of TG molecules in the LD core (**Fig 3A**). This is supported by the depth  
250 profile of Gln72, Cys75 and Ser76 in the TG-rich LD (**Fig S3E**). Additionally, radial  
251 distribution functions (RDF) and coordination numbers  $\|s\|$  verify there are strong  
252 interactions between Gln72 and Ser76 especially to TG oxygens, while the hydrophobic  
253 residues surrounding these polar residues are still stabilized by PL tails (**Fig 3B-D**). In  
254 contrast, in the ER bilayer the HR2 region opens into a more shallow interfacial  
255 conformation below the PL headgroups because of the high barrier for the polar  
256 residues to enter the PL tail region (**Fig S3F**). The relative stability of these two regions  
257 is captured in the potential of mean force (PMF) profiles (**Fig S3G**), demonstrating that  
258 Gln72 and Ser76 are most stable slightly below the PL phosphate groups, where the  
259 polar backbone and sidechain can create favorable interactions with the polar PL  
260 components. Indeed, pulling them into the lipid tail region is highly unfavorable.  
261 Considering Ser76 alone, moving from its interfacial position (~1.0 nm below the  
262 phosphate plane) to a LD kinked position (~2 nm below) would cost ~30 kJ/mol. Such  
263 high penetration barriers may explain why Bsc2<sup>HR2</sup> remains localized in the ER bilayer.  
264 Thus, the dynamic interplay between residues keeps the HR2 region stable within the  
265 ER bilayer, kinetically trapped in the absence of HR1, but also offers a stabilizing force  
266 in the presence of HR1, which could overcome those barriers to enable HR2 to  
267 transition to a more stable LD conformation with both polar and hydrophobic residues  
268 adopting more optimal interactions.

269  
270 It is also notable that Bsc2 interacts with many TG molecules in the TG-rich LD system.  
271 HR2 coordinates with the TG-glycerol backbone, and HR1 forms several contacts with  
272 TG hydrophobic tails that intercalate into the PL monolayer (**Fig 3C,D, Fig S3H-L**).  
273 Thus, the LD core appears to require an abundance of TGs for optimal Bsc2  
274 interactions. The proportion of conformations with a TG molecule directly interacting  
275 with a residue captures the abundance of these interactions (**Fig S3L**). The dominance  
276 of TG-interactions in the HR2 region demonstrates the sequence disposition to immerse  
277 itself within a TG-rich LD core. Additionally, the number of contacts between HR1 and  
278 TG-tails is a significant addition to its interactions with the PL-tails (**Fig S3J**).



279 Collectively, these simulations indicate that Bsc2 adopts significantly different  
280 conformational ensembles in the ER bilayer and LD environments, and that it interacts  
281 with TG molecules extensively in TG-rich LDs (**Fig 3E**). This provides a potential  
282 molecular explanation for Bsc2 preferentially targeting to TG-rich LDs.

283

### 284 ***Loss of Bsc2 alters TG levels via enhanced TG lipolysis***

285 Because Bsc2 LD targeting appeared to require TG, and MD simulations indicated  
286 Bsc2:TG interactions, we next determined whether manipulating Bsc2 expression  
287 influenced cellular TG pools. We first examined steady-state TG and SE levels of WT  
288 and *bsc2Δ* yeast. At LOG phase, *bsc2Δ* yeast display a ~20% steady-state reduction in  
289 TG compared to WT, while SE levels are unaffected (**Fig 4A**). We reasoned this TG  
290 reduction could be the result of either enhanced lipolysis or decreased TG synthesis (or  
291 a combination of both). To dissect this, we first tested whether TG lipolysis or TG  
292 biosynthesis was altered in *bsc2Δ* yeast. Yeast contain three TG lipases: Tgl3, Tgl4,  
293 and Tgl5, of which Tgl3 performs the majority of the TG lipolysis activity in the cell  
294 (Athenstaedt and Daum, 2003, 2005). To test whether TG lipolysis was altered in *bsc2Δ*  
295 yeast, we treated WT, *bsc2Δ*, *tgl3Δ*, and *bsc2Δtgl3Δ* yeast with cerulenin, which blocks  
296 *de novo* fatty acid synthesis and promotes TG lipolysis as a fatty acid source (**Fig 4B**).  
297 We then measured yeast TG levels before ( $T_0$ ) and after 3hrs ( $T_3$ ) of cerulenin treatment  
298 when lipolysis was active. Importantly, WT and *bsc2Δ* yeast contained similar TG levels  
299 at  $T_0$ , as we allowed yeast to grow for 24hrs into STAT phase and accumulate TG (**Fig**  
300 **4C**). Notably, after 3hrs of cerulenin, WT yeast had ~60% of their TG stores remaining,  
301 whereas *bsc2Δ* only had ~20%, suggesting TG lipolysis was elevated in *bsc2Δ* yeast  
302 (**Fig 4C**). As expected, *tgl3Δ* yeast retained ~80% of their TG stores following 3hrs  
303 cerulenin (**Fig 4C**). In contrast to *bsc2Δ* yeast, *bsc2Δtgl3Δ* yeast retained ~70% of their  
304 TG, behaving similar to *tgl3Δ*, suggesting the enhanced TG loss in *bsc2Δ* yeast required  
305 Tgl3. Since yeast also encode Tgl4 and Tgl5 TG lipases, we also performed cerulenin  
306 pulse experiments on WT, *bsc2Δ*, *tgl3Δtgl4Δtgl5Δ*, *bsc2Δtgl3Δtgl4Δtgl5Δ* and measured  
307 TG before and after 3hrs of cerulenin (**Fig 4D**). Similarly, *tgl3Δtgl4Δtgl5Δ* yeast and  
308 *bsc2Δtgl3Δtgl4Δtgl5Δ* contained near identical TG levels following 3hrs of cerulenin-

309 induced TG lipolysis. Collectively, this supports a model where *bsc2Δ* yeast exhibit  
310 enhanced TG lipolysis that is suppressed by genetic depletion of Tgl lipase activity.

311

312 Next, we determined whether Bsc2 loss alters TG biosynthesis. We utilized a yeast  
313 strain in which all of the acyltransferases that synthesize neutral lipids were deleted,  
314 with the exception of Dga1. In this strain, the DGA1 gene was placed under a galactose  
315 inducible promoter (*are1Δare2Δiro1Δ<sup>GAL</sup>DGA1*, referred here simply as “<sup>GAL</sup>DGA1”) (Cartwright et al., 2015). As expected, in the absence of galactose, this yeast strain  
316 contains no neutral lipids and no LDs, and therefore staining yeast with MDH reveals no  
317 LD foci (**Fig 4E, time T=0**). In the presence of galactose in the growth media, the yeast  
318 synthesize TG via Dga1 expression and activity. We deleted *bsc2Δ* in this strain (*bsc2Δ*  
319 <sup>GAL</sup>DGA1) and compared this strain and <sup>GAL</sup>DGA1 strain’s abilities to produce LDs and  
320 TG. First, we imaged LDs via MDH stain in <sup>GAL</sup>DGA1 vs *bsc2Δ* <sup>GAL</sup>DGA1 yeast at  
321 multiple timepoints after galactose induction (**Fig 4E**). Visually, there was no detectable  
322 difference in the appearance of MDH-stained LDs in *bsc2Δ* compared to WT yeasts,  
323 suggesting LD biogenesis was unperturbed by Bsc2 loss. Next, we measured whole-cell  
324 TG levels in the same strains following galactose induction of TG synthesis. We found  
325 no significant difference in TG levels between these strains over multiple time-points  
326 following GAL-induction (**Fig 4F, G**). Additionally, we detected no significant changes in  
327 free fatty acids (FFA) for either strain, although there was a slight upward trend of FFA  
328 accumulation in the *bsc2Δ* yeast after 6 hrs, potentially due to enhanced TG lipolysis  
329 (**Fig 4H**). Altogether, these results support a model where the decreased TG observed  
330 in *bsc2Δ* yeast is not due to decreased TG biosynthesis, but primarily due to enhanced  
331 Tgl3-dependent TG lipolysis.

332

### 333 334 **The Bsc2 HR1 and HR2 regions are sufficient for Bsc2 function**

335 Since the Bsc2 HR1 and HR2 regions appeared responsible for LD interactions, we  
336 next asked whether these regions were sufficient for Bsc2 function. We generated yeast  
337 with chromosomal GFP-tagged full length Bsc2 (Bsc2<sup>FL</sup>-GFP) or truncated Bsc2  
338 encoding only the N-terminal region, HR1, and HR2 (Bsc2<sup>N-HR1+HR2</sup>-GFP). Both GFP-  
339 tagged strains localized to LDs, although Bsc2<sup>N-HR1+HR2</sup>-GFP appeared more dimly

340 localized to LDs (**Fig 4I**). Additionally, we tested the ability of the Bsc2<sup>N-HR1+HR2</sup>-GFP to  
341 protect against enhanced lipolysis (**Fig 4J**). As expected, initial (T<sub>0</sub>) STAT phase TG  
342 levels for Bsc2<sup>FL</sup>-GFP, Bsc2<sup>N-HR1+HR2</sup>-GFP, and *bsc2Δ* were not significantly different  
343 (**Fig 4J**). However, after 3hrs of cerulenin-stimulated lipolysis (T<sub>3</sub>), steady-state TG  
344 levels of yeast expressing Bsc2<sup>N-HR1+HR2</sup> were similar to WT yeast with Bsc2<sup>FL</sup>, and  
345 significantly elevated compared to *bsc2Δ* yeast (**Fig 4J**). This suggests that the LCR  
346 region is not necessary for Bsc2 function, and that the N-HR1-HR2 region is sufficient  
347 for *in vivo* function.

348

### 349 ***Bsc2 over-expression results in TG and LD enlargement***

350 Since Bsc2 loss appeared to enhance TG lipolysis, we next determined how Bsc2 over-  
351 expression would influence LD neutral lipids. We measured steady-state TG and SE  
352 levels of WT yeast expressing either an empty vector (EV) or over-expressed Bsc2  
353 (Bsc2 OE) on a GPD promoter. Strikingly, we observed a more than ~4-fold increase in  
354 TG stores in Bsc2 OE yeast compared to EV controls (**Fig 5A**). In contrast, there was  
355 no effect on SE levels, suggesting Bsc2 OE selectively impacted TG pools (**Fig 5A**). In  
356 line with this, we observed enlarged LDs in Bsc2 OE when they were imaged by thin  
357 section transmission electron microscopy (TEM) (**Fig 5B**). Quantification of TEM  
358 micrographs confirmed significantly increased LD sizes and numbers of detected LDs  
359 per thin-section of Bsc2 OE cells compared to WT (**Fig 5C, 5D**), suggesting Bsc2 OE  
360 elevated TG stores that were stored in enlarged LDs. A portion of the LDs observed in  
361 Bsc2 OE had similar area to those of EV LDs, which are likely explained by the varying  
362 expression levels of the Bsc2 OE construct. Collectively, this indicates that Bsc2 OE  
363 correlates with elevated TG levels and enlarged LDs.

364

365 A possible explanation for the TG accumulation in Bsc2 OE yeast is simply from over-  
366 expressing a hydrophobic LD surface protein, which could potentially crowd away other  
367 LD-resident proteins and perturb TG homeostasis (Kory et al., 2015). To test this  
368 possibility, we measured steady-state neutral lipid levels of yeast over-expressing Pln1  
369 (also known as Pet10), a well characterized yeast perilipin-like protein (Gao et al.,  
370 2017), and compared these to EV and Bsc2 OE expressing yeast (**Fig 5E**). Strikingly,

371 Pln1 OE did not alter TG levels, which closely mirrored the EV control, and did not  
372 phenocopy the TG accumulation observed with Bsc2 OE (**Fig 5E**). Notably, neither of  
373 the constructs altered SE pools. This indicated that the TG and LD accumulation  
374 caused by Bsc2 OE was likely not an artifact of simply overexpressing a LD protein, and  
375 supported a model where Bsc2 OE specifically influenced LD TG levels. In support of  
376 this, Western blot analysis of Bsc2 OE and Pln1 OE expression levels revealed very  
377 similar expression levels of both proteins, suggesting they were expressing at similar  
378 high levels (**Fig 5F**). Collectively, this supports a model where Bsc2 influences LD TG  
379 pools, and that its over-expression is sufficient to induce TG accumulation.

380

### 381 ***Bsc2 loss or over-expression does not impact Tgl lipase abundance nor LD*** 382 ***targeting***

383 Next we investigated the mechanism by which Bsc2 influences TG lipolysis and fat  
384 accumulation. One possibility is that Bsc2 loss or over-expression may alter the total  
385 abundance or LD localization of TG lipases. To investigate this, we first performed  
386 fluorescence imaging of GFP-tagged TG lipases Tgl3, Tgl4, and Tgl5 in WT and *bsc2Δ*  
387 yeast (**Fig 6A**). Imaging revealed there were no obvious changes in Tgl lipase LD  
388 targeting in the absence of Bsc2, suggesting Tgl LD targeting was intact in *bsc2Δ* yeast.  
389 We then examined steady-state Tgl protein levels by Western blotting GFP-tagged  
390 endogenous Tgl proteins. Steady-state protein abundances of Tgl3, Tgl4, and Tgl5 were  
391 unaffected by Bsc2 loss, indicating the enhanced lipolysis observed in *bsc2Δ* yeast was  
392 not simply due to increased total lipase abundances (**Fig 6B**).

393

394 Since Bsc2 OE led to TG accumulation, we also imaged GFP-tagged Tgl proteins in WT  
395 yeast and yeast over-expressing an untagged Bsc2. As expected, yeast over-  
396 expressing Bsc2 displayed larger and more numerous LDs, but this did not alter the LD  
397 localization of any of the GFP-tagged Tgl proteins, suggesting Bsc2 OE does not inhibit  
398 their LD targeting (**Fig 6C**). Similarly, Western blotting revealed the abundances of Tgl  
399 lipases were unchanged in Bsc2 OE compared to WT, indicating that the TG  
400 accumulation in Bsc2 OE was not due to decreased lipase expression (**Fig 6D**).

401 Collectively, this indicates that changes in steady-state TG levels in *bsc2* $\Delta$  or Bsc2 OE  
402 are not due to perturbations in the abundances of TG lipases nor their LD targeting.

403  
404 To determine whether Bsc2 may physically interact with Tgl lipases on the LD surface,  
405 we also conducted co-immunoprecipitation (co-IP) experiments where we over-  
406 expressed either mNG (EV-mNG) alone or Bsc2-mNG in yeast, immunoprecipitated  
407 with anti:mNG affinity resin, and examined the co-IP fractions by LC-MS/MS  
408 proteomics. Notably, numerous canonical LD proteins were significantly enriched in the  
409 Bsc2-mNG co-IP fraction, including Erg6, Hfd1, Faa1, and Eht1 (**Fig 6G**). However, we  
410 did not detect any peptides from Tgl3, Tgl4, nor Tgl5 in this experiment. While we  
411 cannot rule out that Bsc2 and Tgl lipases interact, this indicates that Bsc2 may not form  
412 functionally significant interactions with Tgl lipases.

413  
414 **Bsc2 and Tgl3 independently target to LD subsets**  
415 Since Bsc2 manipulation did not appear to influence Tgl3 (or any Tgl lipase) abundance  
416 or localization, we hypothesized that Bsc2 may demarcate a subset of TG-positive LDs,  
417 and interact with the TG pool there independently of Tgl lipases. If Tgl3 were to also  
418 target this Bsc2-positive LD pool, it could in principle directly compete with Bsc2 for TG  
419 access on the monolayer surface. In this model, Bsc2 may function as a negative  
420 regulator of TG lipolysis through stochastic competition for TG. If so, then depletion of  
421 Bsc2 would result in elevated lipolysis, and Bsc2 over-expression would promote TG  
422 accumulation. In support of this model, MD simulations indicated that Bsc2 strongly  
423 interacted with TG in model LDs (**Fig 3**).

424  
425 To test this model, we directly compared Bsc2 and Tgl3 LD localizations in yeast co-  
426 expressing chromosomally tagged Bsc2-GFP and Tgl3-mRuby. Prior to cerulenin  
427 treatment ( $T_0$ ), we observed LDs with detectable levels of both Bsc2-GFP and Tgl3-  
428 mRuby (**Fig 6E, yellow arrows**), as well as LDs exhibiting only detectable Bsc2-GFP  
429 (**Fig 6E, green arrows**) or Tgl3-mRuby alone (**Fig 6E, red arrows**). This indicated that  
430 Bsc2 and Tgl3 can occupy the same LD, but also distinct LD subsets within a cell,  
431 suggesting they target to LDs independently of one another.

432

433 Next, we imaged these same dual-labeled yeast following 3hrs ( $T_3$ ) of cerulenin  
434 treatment to induce lipolysis (**Fig 6E**). We then quantified LDs for Bsc2-GFP and Tgl3-  
435 mRuby signal above background, and generated signal correlation graphs (**Fig 6F**).  
436 Notably, at  $T_0$  there is a heterogenous mix of Bsc2-GFP and Tgl3-mRuby signals on  
437 LDs, with some LDs displaying abundant Tgl3-mRuby signal but low Bsc2-GFP signal  
438 (Tgl3>Bsc2, upper-left region of chart, red circle), LDs with significant levels of both  
439 Bsc2-GFP and Tgl3-mRuby signals (Tgl3~Bsc2, center to upper-right region of chart),  
440 and LDs with high Bsc2-GFP but low Tgl3-mRuby signal (Bsc2>Tgl3, lower right region  
441 of chart). In line with this, the Pearson correlation was relatively low,  $r=0.3701$ . This  
442 variation of Bsc2-to-Tgl3 signal supports a model where these two proteins  
443 independently target to LDs.

444

445 Following 3hrs of cerulenin treatment, the Bsc2-GFP/Tgl3-mRuby LD signal distribution  
446 changed. LDs now displayed a more linear positive correlation pattern, with Bsc2-GFP  
447 signal correlating with Tgl3-mRuby signal (i.e., Tgl3~Bsc2), and a Pearson correlation of  
448  $r=0.8774$  (**Fig 6F, red circle**). Collectively, this supports a model where LDs with  
449 detectable Tgl3, but low or undetectable Bsc2, may be depleted or altered during TG  
450 lipolysis, whereas LDs with more abundant Bsc2-GFP are retained following 3hrs  
451 cerulenin-induced TG lipolysis.

452

### 453 ***Bsc2 loss alters LD accumulation in yeast stationary phase***

454 As yeast transition into STAT phase, they enter slow growth and shunt excess lipids into  
455 TG for long-term storage. Since Bsc2 loss elevated TG lipolysis, we queried whether  
456 *bsc2* $\Delta$  yeast would display differences in LD abundances as they transitioned into long-  
457 term STAT phase. We quantified the number of LDs per yeast cell for WT and *bsc2* $\Delta$   
458 yeast initially cultured in 2% glucose media and allowed to grow continually in this  
459 media for six days (defined as gradual glucose restriction, GGR). At the start of the  
460 experiment ( $T=0$  days), when cells were in early STAT phase, *bsc2* $\Delta$  yeast exhibited  
461 more MDH-stained LDs compared to WT (**Fig 7A, B**). However, following six days of  
462 GGR, *bsc2* $\Delta$  yeast displayed significantly fewer LDs per cell than WT yeast (**Fig 7A, B**).



463 This supports a model where Bsc2 depletion causes elevated TG lipolysis, which over  
464 time would gradually deplete LD stores in yeast subsisting in long-term low-nutrient  
465 conditions. Collectively, we propose a model in which Bsc2 labels a subset of TG-  
466 containing LDs and marks them for preservation from lipolysis, which could in principle  
467 be utilized as a lipid source in stationary phase subsistence (**Fig 7C**).

468

#### 469 **Discussion:**

470 Emerging work indicates that LDs can be classified into distinct subpopulations within  
471 single cells, and such LD subsets are differentiated by unique proteomes,  
472 morphologies, or spatial distributions (Thiam and Beller, 2017; Eisenberg-Bord et al.,  
473 2018; Teixeira et al., 2018; Schott et al., 2019; Ugrankar et al., 2019). A key knowledge  
474 gap is how distinct proteomes confer specific functions to LD subpopulations. Here, we  
475 demonstrate that Bsc2 is a yeast protein with amphipathic and hydrophobic regions that  
476 enriches on a subpopulation of LDs and acts as negative regulator of TG lipolysis. We  
477 also find that Bsc2 LD targeting requires TG, and MD simulations reveal that Bsc2  
478 hydrophobic regions adopt specific conformations on TG-rich LDs and engage in  
479 extensive interactions with TG. Loss of Bsc2 reduces steady state TG levels at LOG  
480 growth phase (but does not alter SE pools), and we find this is due to enhanced lipolysis  
481 and not by decreased TG synthesis. Bsc2 over-expression accumulates whole-cell TG  
482 and enlarged LDs, a phenotype not replicated by overexpressing another hydrophobic  
483 LD coat protein Pln1/Pet10. We hypothesize this is due to a Bsc2-dependent block in  
484 lipolysis, though this does not exclude other changes such as elevated TG synthesis or  
485 LD biogenesis as contributing factors. We also find that yeast lacking Bsc2 display  
486 altered LD mobilization in late-phase STAT phase. This may indicate that in the  
487 absence of Bsc2, lipolysis in STAT phase is dysregulated and LDs are differentially  
488 mobilized, supporting a model where Bsc2 helps maintain a LD subset for longer-term  
489 subsistence.

490

491 A pervasive question in LD biology is how proteins target to LDs. One factor that clearly  
492 influences both LD protein targeting and stability is the presence of neutral lipids in LDs  
493 (Grillitsch et al., 2011; Schmidt et al., 2013; Klein et al., 2016; Gao et al., 2017; Prévost



494 et al., 2018; Chorlay and Thiam, 2020; Rogers et al., 2022). Our Bsc2 structure-function  
495 analysis indicate that both HR1 and HR2 contribute to organelle targeting. In line with  
496 this, MD simulations indicate that HR1 and HR2 undergo significant conformation  
497 changes in response to different lipid environments. On LDs, HR2 adopts a more  
498 compact helix-kink-helix conformation and interacts with TG, in contrast to a more  
499 “splayed open” conformation in the ER bilayer. HR1 also interacts extensively with TG  
500 and PLs on the LD surface, but disengages entirely from the SE-rich LD surface. This  
501 indicates that both HR1 and HR2 may enable Bsc2 to anchor on LDs, but HR1 may act  
502 as a LD “compositional sensor”, preferentially engaging TG-rich LDs and potentially  
503 explaining why Bsc2 is detected on only LD subsets that may have more accessible TG  
504 *in vivo*. In the absence of TG, Bsc2 may adopt a less favorable conformation and be  
505 targeted for degradation, although further studies are needed for confirmation. This may  
506 explain why Bsc2 LD targeting is significantly less detectable in SE-only yeast.

507  
508 How does Bsc2 regulate TG lipolysis? We show that Bsc2 loss or over-expression does  
509 not alter Tgl lipase LD targeting nor protein abundance, and co-IP mass spectrometry  
510 analysis indicated that Bsc2 does not detectably interact with Tgl3. This collectively  
511 suggests that Bsc2 is likely not a strong interactor with Tgl lipases, and therefore does  
512 not likely regulate lipolysis through strong direct enzyme interactions. An alternative  
513 hypothesis is that Bsc2 competes with Tgl3 for TG-binding on the LD surface by  
514 occupying lipid packing defects, effectively altering TG substrate availability and  
515 prohibiting Tgl lipases from mobilizing TG.

516  
517 Previous visual screens have identified a number of yeast proteins that target LD  
518 subpopulations and aid in the formation and maintenance of specific LD subsets. The  
519 most studied examples are the isoforms Ldo16 and Ldo45, which demarcate a specific  
520 pool of LDs formed near the yeast nucleus-vacuole junction, and are determinants of  
521 the targeting of other LD proteins, such as Pdr16, to these spatially distinct LDs  
522 (Eisenberg-Bord et al., 2018; Teixeira et al., 2018; Ren et al., 2014). During their  
523 investigation into Ldo45/Ldo16 function, Eisenberg-Bord et al also identified Bsc2 as a  
524 marker of the Pdr16-enriched LD subset (Eisenberg-Bord et al., 2018). Our study now

525 characterizes Bsc2 as a regulator of TG lipolysis, as well as provides a working model  
526 for how it localizes to a subset of TG-rich LDs. In the future, we hope to further reveal  
527 the function of this Bsc2-positive LD subset in yeast physiology and metabolic  
528 adaptation.

529

### 530 **Acknowledgements:**

531 The authors would like to thank members of the Henne and Swanson labs for  
532 conceptual help on this manuscript. We also thank Jonathan Friedman, Joel Goodman,  
533 and Daniela Nicastro for conceptual assistance. We would also like to thank Joel  
534 Goodman for providing W303 yeast strains for this study. Finally, we would like to thank  
535 the UT Southwestern proteomics, electron microscopy, and live cell imaging core  
536 facilities for their aid with data collection and analysis.. W.M.H, N.O.S. and E.G.R. are  
537 supported by grants from the Welch Foundation (I-1873), the NIH NIGMS (GM119768),  
538 NIDDK (DK126887), the Ara Parseghian Medical Research Fund, and the UT  
539 Southwestern Endowed Scholars Program. J.M.J.S. and R.J.B are supported by NIH  
540 NIGMS (R35GM143117) and are grateful for computational support from ANTON 2 at  
541 the Pittsburgh Supercomputing Center (MCB210016P), EXPANSE at the San Diego  
542 Supercomputing Center through the ACCESS program (allocation MCB200018)  
543 supported by NSF (grants #2138259, #2138286, #2138307, #2137603, and #2138296),  
544 as well as the Center for High Performance Computing at the University of Utah.

545

### 546 **Methods:**

#### 547 **Yeast growth conditions**

548 The WT parental strain used for all experiments and cloning in this study was BY4741  
549 (MATa *his3Δ1 leu2Δ0 met15Δ0 ura3Δ0*). W303-1A (MATa *leu2-3, 112 trp1-1 can1-100*  
550 *ura3-1 ade2-1 his3-11,14*) yeast strain was used as the parental strain for imaging of  
551 yeast with different neutral lipid-containing backgrounds (Fig 1E) and for galactose  
552 induced TG synthesis experiments (Fig 4E-H). Synthetic-complete (SC) growth media  
553 was used for culturing yeast cells in all experiments, except for experiments where  
554 uracil was excluded to retain pBP73G or pRS316 plasmids. For all experiments (unless  
555 noted below), a colony of yeast was inoculated from a YPD (yeast extract peptone

556 dextrose) plate into SCD (SC dextrose/glucose) media and allowed to grow for ~ 24hr in  
557 a 30°C incubator with shaking at 210 rpm. These cultures were diluted to  $OD_{600} = 0.001$   
558 in SCD media containing 2% glucose (wt/vol), grown overnight in a 30°C incubator  
559 shaking at 210 rpm, and collected at mid-log phase ( $\sim OD_{600} = 0.6$ ) the next day. For  
560 cerulenin experiments, yeast were cut back to  $OD_{600} = 0.1$  in SCD media from an  
561 overnight culture and grown for 24hr, 30°C, 210 RPM. 50  $OD_{600}$  units were collected  
562 from the 24hr culture as pre-lipolysis sample (Time 0hrs, "T<sub>0</sub>"). The remainder of the  
563 24hr culture was cut back to  $OD_{600} = 0.5$  in fresh SCD media containing 10 $\mu$ g/ $\mu$ L  
564 Cerulenin (Cat# C2389; Sigma-Aldrich) final concentration and allowed to incubate for  
565 3hrs before harvesting 50  $OD_{600}$  units as a post-lipolysis sample (Time 3hrs, "T<sub>3</sub>").  
566 Aliquots were then washed in MiliQ water, pelleted, and then processed for lipid  
567 extraction and TLC. Culturing of yeast for cerulenin imaging experiments (Fig 5E) was  
568 done as detailed above, except a small aliquot was removed from 24hr culture as T<sub>0</sub>  
569 and  $\sim 25$   $OD_{600}$  was removed at T<sub>3</sub> from SCD plus Cerulenin cultures. All samples were  
570 concentrated down to 1mL in their respective media, and LDs stained for 5 min with  
571 MDH (SM1000a; Abcepta) at a final concentration of 0.1 mM before imaging. For  
572 induction of TG synthesis, <sup>GAL</sup>DGA1 yeast strains were first cultured in 0.2% dextrose  
573 SCD media, overnight. Cells were then pelleted, washed in MiliQ water, and  
574 resuspended in 2% raffinose SCR media (2% raffinose substituted for dextrose in SCD)  
575 at  $OD_{600} = 0.5$  and cultured for 24hrs. Following 24hr incubation, 50  $OD_{600}$  units were  
576 removed as Time 0 ("T<sub>0</sub>") sample for lipid extraction and TLC. The remainder of the  
577 yeast were pelleted, washed in MiliQ water, then cut back to  $OD_{600} = 2$  in SCG media  
578 (2% galactose substituted for dextrose in SCD), and incubated for 22hrs. 50  $OD_{600}$  unit  
579 aliquots were removed at 2, 4, 6, and 22hrs incubation, washed in Mili-Q water, then  
580 pelleted and processed for lipid extraction and TLC. For imaging of induced LDs,  
581 <sup>GAL</sup>DGA1 yeast strains were cultured same as above, except 1mL aliquots were taken  
582 from SCG cultures at indicated time points and incubated for 5 min with MDH at a final  
583 concentration of 0.1 mM to visualize LDs. For gradual glucose restriction LD imaging  
584 experiments, yeast were cultured from a plate overnight in SCD media. 1mL of  
585 overnight culture was taken for Day 0, stained with MDH and LDs were imaged. The  
586 remainder of the culture was cut back to  $OD_{600} = 0.1$  in fresh SCD media and incubated

587 for 6 days, with 1mL aliquots taken each day and LDs imaged after staining with MDH.  
588 For immunoprecipitation and proteomics, cells were cultured from plates into SCD-URA  
589 (without uracil) overnight. Then, yeast were cut back to  $OD_{600} = 0.1$  into same drop-out  
590 media, then incubated for 24hrs (under general growth conditions described above) until  
591 they reached stationary phase. After 24hrs, 250  $OD_{600}$  units were collected for each  
592 sample, pelleted at 4000 RPM for 5 min, washed in Mili-Q water then pelleted again.  
593 Final yeast pellets were then subjected for protein extraction and immunoprecipitation.

594

## 595 **Molecular Dynamics Simulations**

596 **Structure prediction:** TOPCONS (Tsirigos et al., 2015) and TmAlphaFold (Dobson et  
597 al., 2023) were used to predict the membrane-embedded regions of Bsc2. The protein  
598 structure prediction tools RoseTTAFold (Baek et al., 2021) and AlphaFold2 (Jumper et  
599 al., 2021) were then used to model the structure of Bsc2<sup>N-HR1+HR2</sup> (amino acids 1-100).  
600 The resulting output poses from both resources agreed on the placement and alignment  
601 of all helices within the protein. This included HR1 in a single amphipathic helical  
602 structure and HR2 in a helix-kink-helix structure. The final structure was taken from  
603 RoseTTAFold, using no pairing or templates. Notably, the 5 top-scoring structures from  
604 RoseTTAFold had quite similar alignment. The output for TOPCONS transmembrane  
605 topology and the selected final structure are in Figures S3M and S3C, respectively.

606

607 **Simulations:** The CHARMM36 force field (Campomanes et al., 2021), (Klauda et al.,  
608 2010) was used in all simulations. The bilayer system was created in the CHARMM-GUI  
609 membrane builder (Jo et al., 2008) with a ratio of 88:37:10 ratio of 3-palmitoyl-2-oleoyl-  
610 D-glycero-1-phosphatidylcholine (POPC), 2,3-dioleoyl-D-glycero-1-  
611 phosphatidylethanolamine (DOPE), and phosphatidylinositol (SAPI), respectively. This  
612 corresponds to 135 PLs per leaflet (270 PLs total per system). The LD systems had the  
613 same membrane compositions for their respective monolayer leaflets and included an 8  
614 nm thick neutral lipid core composed of a 90:10 CHYO:TG ratio for the SE-rich LD and  
615 a pure-TG core for the TG-rich LD. These LD structures were taken from the last frame  
616 of 8  $\mu$ s long simulations conducted in our previous work, which importantly had already  
617 obtained the properly equilibrated distributions (Braun and Swanson, 2022). The

618 membrane systems were embedded in 5nm of water and 0.15M NaCl on top and  
619 bottom to account for proper hydration and physiological conditions. To insert the Bsc2  
620 structure into the membrane systems, in-house MDAnalysis (Gowers et al., 2016)  
621 scripting was used, placing HR2 into the bilayer and LD monolayers and HR1 0.5 nm  
622 above the membrane. Overlapping PLs and neutral lipids were removed and the  
623 systems were minimized for 5000 steps before being re-equilibrated for 10 ns using  
624 NVT conditions and 100 ns using NPT conditions. For the bilayer and TG-LD systems,  
625 long-timescale simulations lasting 4.5  $\mu$ s were conducted using the Anton2  
626 supercomputer provided by Pittsburg Supercomputing Center (Shaw et al., 2014), while  
627 the 90:10 CHYO:TG system was run for 1  $\mu$ s on the EXPANSE supercomputer provided  
628 by San Diego Supercomputing Center (Strande et al., 2021). The simulations were  
629 conducted using a 2.4 fs timestep in the Anton2 simulations, and a 2 fs timestep in the  
630 EXPANSE simulation. The temperatures were all set to 310 K, using Nose-Hoover  
631 thermostat (Nosé, 1984),(Hoover, 1985) and a temperature coupling time constant of 1  
632 ps. The particle mesh Ewald (PME) algorithm (Essmann et al., 1995) was used to  
633 calculate the long-range electrostatic interactions with a cutoff of 1.0 nm. Lennard-  
634 Jones pair interactions were cutoff at 12 Å with a force-switching function between 8  
635 and 12 Å, and pressure was maintained semi-isotropically using the Parrinello-Rahman  
636 barostat (Parrinello and Rahman, 1981). The pressure was set to 1.0 bar, with a  
637 compressibility of,  $4 \times 10^{-5} \text{ bar}^{-1}$ , and a coupling constant of 5.0 ps. The hydrogen  
638 bonds were constrained with the LINCS algorithm (Hess, 2008). We calculated the  
639 coordination numbers, RDFs, and protein positions using MDAnalysis, and in-house  
640 Python scripting, and Gromacs tools (Abraham et al., 2015), and the images were  
641 rendered using Visual Molecular Dynamics (VMD) (Humphrey et al., 1996).

642

643 **Metadynamics:** Potentials of mean force (PMFs) for single amino acids permeating  
644 through a bilayer were conducted using Well-Tempered Metadynamics (Barducci et al.,  
645 2008) biasing the z-component connecting the center of mass of the membrane and the  
646 center of mass of the amino acid. The bilayers used for the metadynamics simulations  
647 were created from same initial systems described above. The system was hydrated 5  
648 nm of water surrounding each side with 0.15 M NaCl, and the respective amino acid

649 was placed 2 nm above the membrane surface. The amino acids included in our  
650 simulations were Phe, Gln, Leu, Ser. The amino acids were neutralized by patching with  
651 the NH<sub>2</sub> (CT2) group at the C-terminus, and an acetyl (ACE) at the N-terminus. Four  
652 replicas of each amino acid system were run for 500 ns each. The final PMF was  
653 obtained by averaging the PMFs obtained from the four simulations. The Gaussian  
654 function was deposited every 2 ps with a height of 0.05 kJ/mol and the bias factor was  
655 set to 15. Simulations were conducted in the canonical ensemble (NVT) at a  
656 temperature of 310K, using the Gromacs version 2019.4 (Abraham et al., 2015) patched  
657 with PLUMED version 2.5.3 (Tribello et al., 2014).

658

### 659 **Lipid extraction and TLC**

660 For lipid extraction, 50 OD<sub>600</sub> units of cells were collected for each sample, and pellet  
661 wet weights were normalized and recorded prior to extraction. Lipid extraction was  
662 performed using a modified Folch method (Folch et al., 1957). Briefly, cell pellets were  
663 resuspended in Milli-Q water with 0.5-mm glass beads (Cat # G8772-500G; Millipore  
664 Sigma) and lysed by three 1-min cycles on a MiniBeadBeater. Chloroform and methanol  
665 were added to the lysate to achieve a 2:1:1 chloroform:methanol:water ratio. Samples  
666 were vortexed, centrifuged to separate the organic solvent and aqueous phases, and  
667 the organic solvent phase was collected. Extraction was repeated a total of three times.  
668 The organic solvent phases were combined and washed twice with 1 ml 1.0 M KCl.  
669 Prior to TLC, lipid samples were dried under a stream of argon gas and resuspended in  
670 1:1 chloroform:methanol to a final concentration corresponding to 4 µl of solvent per 1  
671 mg cell pellet wet weight. Isolated lipids were spotted onto heated glass-backed silica  
672 gel 60 plates (1057210001; Millipore Sigma), and neutral lipids were separated in a  
673 mobile phase of 80:20:1 hexane:diethyl ether:glacial acetic acid. TLC bands were  
674 visualized by spraying dried plates with cupric acetate in 8% phosphoric acid and  
675 baking at 145°C for an hour.

676

### 677 **TLC quantification**

678 Stained TLC plates were scanned and then processed for quantification using Fiji  
679 (ImageJ). Each plate was spotted with a neutral lipid reference standard mixture (Cat #



680 18-5C; Nu-Chek Prep). The standard was prepared in chloroform to a final  
681 concentration of 10 mg/ml and diluted to 1 $\mu$ g/ $\mu$ L before loading onto plate. The neutral  
682 lipid standard was used to create a standard curve in which the x-axis displayed the  
683 calculated lipid mass in micrograms, and the y-axis displayed the band intensity  
684 estimated by using Fiji.

685

### 686 **LD number and area quantification**

687 For Fig 5B TEM images, LDs were counted by hand using the Fiji multipoint tool. The  
688 area of these same LDs was determined by tracing the perimeter of each by hand using  
689 the Fiji freehand line tool. Each LD was selected as an ROI, then the area quantified  
690 using the “Measure” tool in Fiji and reported in  $\mu\text{m}^2$ . For fluorescence images in Fig 7A,  
691 LD number per cell was quantified by counting MDH-stained LDs, by hand, using the Fiji  
692 multipoint tool.

693

### 694 **Fluorescent signal quantification of Bsc2 and Tgl3 imaging under cerulenin 695 treatment**

696 In Fig 6F, fluorescent signals for Bsc2-GFP and Tgl3-mRuby foci were quantified from  
697 confocal maximal projections from Fig 6E imaging using Fiji. To summarize, for each  
698 image, the midplane z-section of the DAPI channel (MDH-stained LDs) was converted  
699 to grayscale, then random LDs were selected using the oval selection tool. Each of  
700 these LDs were marked as individual ROIs, along with a random area with no  
701 fluorescent signal selected as background, then all were saved to the ROI manager.  
702 Next, the maximal projections for the DAPI, RFP, and GFP channels were merged into  
703 one image, and the previously selected LD ROIs were overlaid on to image. The  
704 fluorescent signal for each channel, represented as Raw Integrated Density, was then  
705 measured for each ROI. These values were then subtracted from the background ROI  
706 integrated density for each channel to obtain a Bsc2-GFP and Tgl3-mRuby signal value  
707 for each ROI. Then, for both GFP and mRuby channels, each ROI signal measurement  
708 was divided by the ROI with highest Raw Integrated Density to obtain a ratio (Raw  
709 Integrated Density / Max Integrated Density). For each ROI, said ratio for Bsc2-GFP  
710 signal and Tgl3-mRuby signal were plotted against each other for “No Cerulenin” and



711 “3hr Cerulenin” conditions. Pearson’s correlation coefficient ( $r$ ) was calculated for both  
712 graphs.

713

### 714 **Statistical analysis**

715 Graphpad Prism 8 software was used to perform all statistical analyses, with graphs  
716 indicating the mean + standard deviation. Two-tailed, unpaired  $t$  tests were performed  
717 with Welch’s correction. Where indicated, ordinary one-way ANOVA tests were  
718 performed, with Tukey’s multiple comparisons test applied. For both  $t$  tests and ANOVA,  
719 ns,  $P \geq 0.05$ ; \*,  $P < 0.05$ ; \*\*,  $P < 0.01$ ; \*\*\*,  $P < 0.001$ ; \*\*\*\*,  $P < 0.0001$ .

720

### 721 **Conventional TEM**

722 Yeast cells were grown in the desired conditions and processed in the University of  
723 Texas Southwestern Electron Microscopy Core Facility using a adapted protocol from  
724 Wright (Wright, 2000). In brief, cells were fixed in potassium permanganate, dehydrated,  
725 and stained in uranyl acetate and embedded in Spurr Resin. Specimen blocks were  
726 polymerized at 60°C overnight and sectioned at 70 nm with a diamond knife (Diatome)  
727 on a Leica Ultracut UCT 6 ultramicrotome (Leica Microsystems). Sections were  
728 poststained with 2% uranyl acetate in water and lead citrate. Sections were placed on  
729 copper grids (Thermo Fisher Scientific). Images were acquired on a Tecnai G2 spirit  
730 TEM (FEI) equipped with a LaB6 source at 120 kV by using a Gatan Ultrascan charge-  
731 coupled device camera.

732

### 733 **Whole cell protein extraction and sample preparation**

734 Whole cell protein extracts were isolated from 25 OD<sub>600</sub> units of cells. Pellet wet weights  
735 were normalized prior to freezing at -20°C. Frozen cell pellets were incubated with 20%  
736 trichloroacetic acid (TCA) for 30 min on ice with occasional mixing using a vortex.  
737 Precipitated proteins were pelleted in a 4°C centrifuge at 16,000 g for 5 min. After  
738 removing the supernatant, the pellet was washed three times with cold 100% acetone  
739 followed by brief sonication. After the washes, the protein pellets were dried in an RT  
740 speed vac for 15 min to remove residual acetone. Dried protein pellets were neutralized  
741 with 1.5M Tris-HCl pH 8.8, then resuspended directly in 250µL of 1X Laemmli sample

742 buffer (Laemmli, 1970). Samples were briefly sonicated and boiled at 95°C for 5 min.  
743 Fig 5F protein samples (Bsc2-mNG OE and Pln1-mNG OE) were extracted as  
744 described above, except following neutralization, protein pellets were resuspended in  
745 250µL resuspension buffer (50mM Tris pH 6.8, 1mM EDTA, 1% SDS; 6M Urea, 1X Halt  
746 Protease and Phosphatase Inhibitor Cocktail [78441; Thermo Fisher Scientific], and 1%  
747 beta-mercaptoethanol). These samples were sonicated briefly, but not subjected to  
748 heating/boiling to prevent aggregation of these hydrophobic droplet proteins. 2X  
749 Laemmli sample buffer was added to these samples immediately prior to gel loading.

750

### 751 **Immunoblot analysis**

752 Following protein extraction, samples were pelleted at 16,000 g for 3 min to remove  
753 insoluble debris. Equal volumes of each sample were then subjected to SDS-PAGE and  
754 western blot analysis. Proteins were separated on a precast Mini-PROTEAN® TGX™  
755 10% SDS-PAGE gel (4561034; BioRad) and then transferred to a 0.45 µm nitrocellulose  
756 membrane in Towbin SDS transfer buffer (25 mM Tris, 192 mM glycine, 20% methanol,  
757 and 0.05% SDS; pH 8.2) using a Criterion tank blotter with plate electrodes (1704070;  
758 BioRad) set to 70V constant, for 1hr. Immediately after transfer, membranes were  
759 stained with PonceauS, imaged on a ChemiDoc™ Touch Gel Imager (1708370;  
760 BioRad) and cut using a clean razor blade. Membranes were blocked with 5% milk  
761 dissolved in Tris-buffered saline +Tween (TBS-T) buffer, and primary antibodies were  
762 allowed to bind overnight at 4°C. Primary antibodies used for determining protein  
763 expression are as follows: GFP (ab290; 1:5,000 dilution; Abcam), GAPDH (ab9485;  
764 1:2,500 dilution; Abcam), mNeonGreen (Cat# 32f6; 1:1,000 dilution; ChromoTek).  
765 Immunoblots were developed by binding HRP-conjugated anti-rabbit IgG  
766 (ab6721;1:5,000; Abcam) or anti-mouse IgG (ab6728; 1:1,000; Abcam) secondary  
767 antibodies to the membrane for 1 h in the presence of 5% milk followed by four washes  
768 in TBS-T and developing with ECL substrate (1705061; BioRad). Blot signal was  
769 captured using the same BioRad ChemiDoc™ Touch Gel Imager, as noted above.  
770 Protein expression levels were quantified by measuring band intensity using ImageJ  
771 and normalizing these values to wildtype to generate an abundance value relative to  
772 control.

773

## 774 **Whole cell protein extraction for immunoprecipitation**

775 Yeast were collected and prepared as described above. The samples were subjected to  
776 a modified cold glass bead cell lysis and protein extraction protocol (DeCaprio and Kohl,  
777 2020). In brief, cells were washed in cold tris-buffered saline and pelleted at 2000 g for  
778 5 min at 4°C. Yeast pellets were resuspended in ice-cold lysis buffer plus protease  
779 inhibitors (50mM Tris-HCl pH 7.5, 120mM KCl, 5mM EDTA, 0.1% Nonidet P-40  
780 Substitute, 10% Glycerol, 1mM DTT, 1mM PMSF, and 1X Halt Protease and  
781 Phosphatase Inhibitor Cocktail [78441; Thermo Fisher Scientific]), transferred to a 2 mL  
782 screw-cap microcentrifuge tube (Cat # 02-681-343; Fisher Scientific) containing glass  
783 beads (Cat # G8772-500G; Milipore Sigma), and lysed 3 times in a MiniBeadBeater for  
784 90 sec each at 4°C. In between bead beating, samples were chilled in an ice bath for 2  
785 min. Samples were then pelleted at 1000 g at 4°C for 30 sec. Supernatants were  
786 transferred to a 1.5 mL microcentrifuge tube, and beads in screw-cap tubes were  
787 washed once again in the same lysis buffer plus protease inhibitors and pelleted like  
788 above. Supernatants of screw-cap tubes were transferred to same 1.5 mL tube as  
789 above, and were cleared of insoluble debris, twice at 16000 g for 10 min at 4°C. A final  
790 clearance spin of lysates was done at 20000 g for 30 min at 4°C. Protein concentrations  
791 were then quantified using the Pierce™ BCA Protein Assay Kit (Cat # 23227; Thermo  
792 Fisher Scientific) in a 96-well plate format (Cat # 353072; Corning). Sample  
793 absorbances were measured at 562 nm using a VersaMax Microplate Reader and  
794 SoftMax Pro Software. Absorbances were converted to protein concentration using a  
795 bovine serum albumin standard curve.

796

## 797 **Immunoprecipitation (IP)**

798 For immunoprecipitation, an mNeonGreen-Trap Agarose Kit (ntak-20; Chromotek) to  
799 pull down Bsc2-mNeonGreen (mNG) fusion protein was used, according to  
800 manufacturer's protocol. To begin, for each sample 25µL of agarose beads containing  
801 an anti-mNG nanobody were washed in 500µL of ice cold dilution buffer (10mM Tris-  
802 HCl pH 7.5, 150mM NaCl, 0.5mM EDTA, and 0.018% sodium azide), centrifuged down  
803 at 2500 g for 5 min at 4°C, and buffer removed. 4000 µg of protein lysate from cold

804 glass bead lysis for each sample was centrifuged at 16000 g, 5 min, at 4°C. Then,  
805 lysates were incubated with the washed mNG beads and rotated end over end for 1 hr  
806 at 4°C. Samples were then spun down at 2500 g for 5 min at 4°C and supernatants  
807 removed. Beads were then washed three times in 500µL wash buffer (10 mM Tris/Cl pH  
808 7.5, 150 mM NaCl, 0.05 % Nonidet™ P40 Substitute, 0.5 mM EDTA, and 0.018 %  
809 sodium azide) and centrifuged like above, in between each wash. After final wash and  
810 spin, supernatant was removed, beads were transferred to a fresh 1.5 mL tube. 2X  
811 Laemmli sample buffer was added to beads, and samples were boiled for 5 min at 95°C  
812

### 813 **LC-MS/MS proteomics**

814 Following boiling step, IP samples were centrifuged at 2500 g, for 2 min at 4°C to pellet  
815 beads. The entirety of each supernatant was loaded onto a 10% mini-protean TGX gel  
816 (4561033; Bio-Rad). Samples were subjected to electrophoresis at 90 V constant until  
817 the dye front was ~10 cm into the gel. The gel was subsequently removed from the  
818 casing and stained with Coomassie reagent (0.5 Coomassie G-250, 50% methanol,  
819 10%  
820 acetic acid) for 10 min on an RT rocker. The gel was then rinsed three times in sterile  
821 Mili-Q water to gently destain. Once the gel was sufficiently destained, 10-cm gel bands  
822 were excised from each lane, taking care to exclude the stacking gel and dye front. Gel  
823 bands were further cut into 1-mm squares and placed into sterile microcentrifuge tubes.  
824 Samples were digested overnight with trypsin (Pierce) following reduction and alkylation  
825 with DTT and iodoacetamide (Sigma-Aldrich). The samples then underwent solid-phase  
826 extraction cleanup with an Oasis HLB plate (Waters), and the resulting samples were  
827 injected onto an Orbitrap Fusion Lumos mass spectrometer coupled to an Ultimate  
828 3000 RSLC-Nano liquid chromatography system. Samples were injected onto a 75 µm  
829 i.d., 75-cm long EasySpray column (Thermo Fisher Scientific) and eluted with a gradient  
830 from 0 to 28% buffer B over 90 min. The buffer contained 2% (vol/vol) acetonitrile and  
831 0.1% formic acid in water, and buffer B contained 80% (vol/vol) acetonitrile, 10%  
832 (vol/vol) trifluoroethanol, and 0.1% formic acid in water. The mass spectrometer  
833 operated in positive ion mode with a source voltage of 1.5–2.0 kV and an ion transfer  
834 tube temperature of 275°C. MS scans were acquired at 120,000 resolution in the

835 Orbitrap, and up to 10 MS/MS spectra were obtained in the ion trap for each full  
836 spectrum acquired using higher-energy collisional dissociation for ions with charges 2–  
837 7. Dynamic exclusion was set for 25 s after an ion was selected for fragmentation.  
838 RawMS data files were analyzed using Proteome Discoverer v 2.4 (Thermo Fisher  
839 Scientific), with peptide identification performed using Sequest HT searching against the  
840 *Saccharomyces cerevisiae* protein database from UniProt. Fragment and precursor  
841 tolerances of 10 ppm and 0.6 dalton were specified, and three missed cleavages were  
842 allowed. Carbamidomethylation of Cys was set as a fixed modification, with oxidation of  
843 Met set as a variable modification. The false-discovery rate cutoff was 1% for all  
844 peptides.

845

#### 846 **Cell culture**

847 U2-OS cells were cultured in DMEM (D5796; Sigma) supplemented with 10% Cosmic  
848 Calf Serum (SH30087.04; Hyclone), 1% penicillin streptomycin solution (30-002-CI;  
849 Corning), and 25mM HEPES (H0887;Sigma). The cells were passaged when they  
850 reached 80–90% con- fluence with 0.25% trypsin-EDTA (25-053-CI; Corning). To  
851 promote LD biogenesis, cells were incubated with 600  $\mu$ M of OA conjugated with 100  
852  $\mu$ M of FA-free BSA (A8806; Sigma-Aldrich) for 16 hours.

853

#### 854 **Cloning and transient transfection**

855 Full length Bsc2-EGFP was generated after PCR amplification of full length Bsc2 from a  
856 yeast pBP73G Bsc2 untagged overexpression plasmid and cloning into pEGFP-N2  
857 (XhoI/BamHI). pEGFP-N2 alone, served as a negative control. The plasmids were  
858 transfected into U2-OS cells using Lipofectamine 3000 Transfection Reagent  
859 (L3000001; Invitrogen) and Opti-MEM (31985-070; Gibco) for 48 h before experiments.

860

#### 861 **IF staining**

862 Cells were fixed with 4% PFA solution in PBS for 15 min at RT. For IF staining, fixed  
863 cells were washed with PBS, permeabilized with 0.2% NP-40 in PBS at RT for 3 min,  
864 and blocked in IF buffer (PBS containing 3% BSA, 0.1% NP-40, and 0.02% sodium  
865 azide) for 45 min. The cells were then incubated with primary antibody in IF buffer for 1

866 h, washed thrice with PBS, incubated with secondary antibody in IF buffer for 30 min,  
867 and given two washes with PBS. Cells were then incubated with MDH AutoDOT  
868 (SM1000a; 1:1,000 dilution; Abcepta) for 15 min, washed thrice with PBS, and then  
869 stored in PBS at 4°C before imaging. The primary antibody used was mouse anti-  
870 Hsp90B1 (AMAb91019; 1:100 dilution; Sigma-Aldrich). The secondary antibody used  
871 was donkey anti-mouse Rhodamine Red-X (715-295-151; 1:1,000 dilution; Jackson  
872 Laboratories). LDs were visualized by staining the cells with AutoDOT.

873

### 874 **Fluorescence microscopy**

875 For confocal microscopy, yeast cells were grown as described above and collected by  
876 centrifugation at 4,000 rpm for 5 min. Where indicated, cells were incubated for 5 min  
877 with MDH (SM1000a; Abcepta) at a final concentration of 0.1 mM to visualize LDs.

878 Before imaging, yeast cells were washed with 1 ml of Mili-Q water and resuspended in  
879 50-100 $\mu$ L of Mili-Q water. Mammalian cells were imaged in 8-well Nunc™ Lab-Tek™ II  
880 chambered coverglass (Cat #154409; Thermo Scientific). All images were taken as  
881 single slices at approximately mid-plane using a Zeiss LSM880 inverted laser scanning  
882 confocal microscope equipped with Zen software. Images were taken with a 63x oil  
883 objective NA = 1.4 or 40x oil objective NA = 1.4 at RT, unless noted otherwise.  
884 Approximately seven Z-sections of each image were taken for yeast, and four for  
885 mammalian cells. The merged images were maximum intensity z-projections, generated  
886 by Fiji. For epifluorescence microscopy, cells were grown, stained, and collected as  
887 described above. Imaging was performed on an EVOS FL Cell Imaging System at RT.

888

### 889 **Yeast strain generation and plasmid construction**

890 A modified version of the lithium acetate method was used for the generation of all  
891 yeast knock outs and knock ins. Briefly, yeast were diluted from a ~24h culture to an  
892 OD<sub>600</sub> = 0.001 in YPD media and allowed to grow 16-20h, overnight, until they reached  
893 OD<sub>600</sub> = 0.6. For each transformation, the entire culture was pelleted (50mL), washed  
894 with sterile Mili-Q water, washed with 0.1 M lithium acetate, pelleted and resuspended  
895 in 1mL 0.1M lithium acetate. 100 $\mu$ L this yeast-lithium acetate suspension was added to  
896 ~1mL of transformation solution (40% polyethylene glycol in 0.1 M lithium acetate, 0.25



897  $\mu\text{g}/\mu\text{l}$  single-stranded carrier DNA [D9156; Sigma-Aldrich]) supplemented with 5-10 $\mu\text{g}$  of  
898 PCR product. Transformations were vortexed and incubated at 30°C for 45 min, then  
899 42°C for 30 min. Cells were then pelleted at 2000 g, 2 min and gently washed with  
900 sterile Mili-Q water, then pelleted again. For antibiotic marker transformations, yeast  
901 were then resuspended in 2mL fresh YPD media and allowed to recover overnight,  
902 30°C, 225 RPM. The following day, cells were pelleted and plated onto YPD plates  
903 containing antibiotic and incubated at 30°C, 2-3 d. For auxotrophic marker  
904 transformations, yeast were plated onto SC dropout plates same day (immediately after  
905 Mili-Q washing step) and incubated at 30°C, 2-3 d. Plasmids were generated for this  
906 study using Gibson Assembly following the manufacturer's protocol (E2611; NEB). All  
907 pBP73-G vectors were cut with XbaI and XhoI. For yeast plasmid transformations, cells  
908 were grown in YPD media, overnight until saturation. 1 mL of overnight culture was  
909 pelleted at 12000 RPM, 2 min at RT. Pellets were then washed in 0.1M Lithium Acetate  
910 and centrifuged again, like above. Yeast cells were then resuspended in ~300  $\mu\text{L}$   
911 transformation solution (40% polyethylene glycol in 0.1 M lithium acetate, 0.25  $\mu\text{g}/\mu\text{l}$   
912 single-stranded carrier DNA [D9156; Sigma-Aldrich]) with 1 $\mu\text{g}$  of plasmid DNA, vortexed  
913 briefly, and incubated at RT for 1hr. Transformations were then gently mixed, DMSO  
914 added to a final concentration of 10%, and heat shocked at 42°C, 10 min. Samples were  
915 then put on ice for 2 min, then entire reaction was plated onto SCD plates lacking uracil,  
916 and incubated at 30°C for 2-3 days.

917

### 918 **Proteomics quantification**

919 Proteomics quantification and analysis were performed using Excel. All samples were  
920 analyzed in triplicate. To adjust for total protein differences between samples, the sum  
921 of all spectral counts within each sample was taken and divided by the average of the  
922 spectral count sums in the empty vector soluble mNG (EV-mNG) samples. This ensured  
923 differences observed in the proteomics data are not due to unequal "loading" into the  
924 MS. Next, only proteins with detectable spectral counts in all 3 replicates of the Bsc2-  
925 mNG IP samples were considered for analyses, regardless of whether they were  
926 present in the EV-mNG IP replicates. From this list proteins, those with undetectable  
927 spectral counts in the EV-mNG IP replicates had their spectral counts changed from "0"



928 to “1” to aid in quantifications for statistical analysis. To generate a high-confidence list  
929 of Bsc2 interacting proteins, the average spectral counts of each protein from the Bsc2-  
930 mNG IPs were divided by the corresponding average spectral counts from the EV-mNG  
931 IP samples. Therefore, proteins more abundant in the Bsc2-mNG IP samples would  
932 produce a ratio >0. To generate volcano plots in GraphPad Prism,  $\log_2$  values were  
933 calculated for the ratio of average protein expression in EV-mNG and Bsc2-mNG (i.e.,  
934  $\log_2[\text{protein A in Bsc2-mNG}/\text{protein A in EV-mNG}]$ ). Then, the p-value for significance of  
935 the abundance for each protein in EV-mNG and Bsc2-mNG replicate samples was  
936 calculated via t test. Finally, the  $-\log_{10}$  of these p-values was calculated and plotted  
937 against the above  $\log_2$  values in volcano plot form. Significance cut-off on the y-axis  
938 was the  $-\log_{10}$  of  $P = 0.05$ , or 1.3.

939

#### 940 **Cartoon development**

941 All cartoons created with BioRender.com or Microsoft Powerpoint. For Fig 2A, the  
942 hydrophobicity plot was generated using data collected from Phobius open access  
943 hydrophobicity predictor (Käll et al., 2004) and the helical wheel generated using  
944 HeliQuest (Gautier et al., 2008).

945

#### 946 **Figure Legends:**

947 **Figure 1. Bsc2 enriches on a TG-containing LD subpopulation at logarithmic**  
948 **phase. (A)** Logarithmic (LOG) and stationary (STAT) phase imaging of yeast dual-  
949 tagged for Bsc2-GFP, Erg6-mRuby. Yellow arrows indicate Bsc2-enriched LDs and  
950 white arrows indicate LDs where Bsc2 is undetectable or absent. **(B)** Quantification of  
951 percentage of Bsc2-positive (Bsc2<sup>+</sup>) LDs out of total Erg6-mRuby LDs, per cell, at LOG  
952 and STAT phase. For both LOG and STAT samples,  $n = 50$  cells. **(C)** Bsc2-GFP  
953 expressing yeast stained with LD dye MDH and imaged at LOG phase growth. Yellow  
954 arrows are Bsc2-positive LDs, white arrows denote Bsc2-negative LDs. **(D)** Imaging of  
955 Bsc2-mNeonGreen (Bsc2-mNG) yeast in different neutral lipid-containing backgrounds  
956 with MDH-stained LDs at LOG phase. TG = Triglyceride, SE = Sterol Ester. Far left  
957 column represents non-contrast adjusted images for Bsc2-mNG. Statistics represent  
958 Unpaired t test with Welch’s correction. \*\*\*,  $P < 0.001$ . Scale bars, 5 $\mu\text{m}$ .

959

960 **Figure 2. Hydrophobic Region 1 (HR1) of Bsc2 is responsible for LD-targeting.**

961 **(A)** Hydrophobicity plot generated by Phobius online transmembrane topology and  
962 signal peptide predictor (top), paired with a schematic of Bsc2 protein architecture  
963 (middle), and a helical wheel of the Bsc2 amphipathic segment in HR1 (bottom). HR1 =  
964 Hydrophobic Region 1, HR2 = Hydrophobic Region 2. **(B)** Log phase imaging of yeast  
965 over-expressing various Bsc2-mNG truncations with LDs stained with MDH. Yellow  
966 arrows indicate LD-targeting. LCR = Low Complexity Region. **(C)** Imaging of U2-OS  
967 cells transiently overexpressing either empty vector (EV-EGFP) or Bsc2, both tagged  
968 with EGFP (Bsc2-EGFP) and treated with oleic acid (OA), overnight to induce LD  
969 formation. Cells were colF stained with  $\alpha$ -EGFP (green),  $\alpha$ -HSP90B1 (ER, red), and  
970 LDs stained with MDH (blue) and imaged with confocal microscope. Inset shows Bsc2-  
971 LD targeting. Mammalian scale bar, 10  $\mu$ m. Yeast scale bar, 5 $\mu$ m.

972

973 **Figure 3: Molecular dynamics simulations indicate Bsc2 adopts a unique**  
974 **conformational ensemble on TG-rich LDs**

975 **(A)** In the modeled ER bilayer (left), the HR2 sequence opens to allow polar residues in  
976 the kink to evade the unfavorable phospholipid (PL) tail region. In the TG-rich LD  
977 (middle) polar residues (purple and orange) are stabilized by TG glycerol groups in the  
978 LD core. In the SE-rich LD (right), HR2 retains a kinked conformation with polar  
979 residues stabilized by Cholesteryl oleate (CHYO) oxygens in the LD core. Notably, the  
980 amphipathic HR1 sequence fails to LD associate due to significantly decreased packing  
981 defects. **(B)** Radial distribution functions (RDF) of GLN, CYS, and SER in the HR2  
982 interacting with TG glycerol oxygens. **(C)** Cross section of the LD monolayer highlights  
983 interactions between GLN72 (purple), SER76 (yellow) and TG oxygens (inset). **(D)** The  
984 coordination number between residue heavy atoms and different sections of the TG  
985 molecules verifies that most interactions are with the glycerol (GL) group. **(E)** Schematic  
986 of modeled Bsc2<sup>N-HR1-HR2</sup> adopting conformations in the ER bilayer, TG-rich LD, and SE-  
987 rich LD as in Panel A.

988

989 **Figure 4. Bsc2 deletion results in enhanced Tgl3 lipase-dependent TG lipolysis**

990 **(A)** Log phase, whole cell TG (left graph) and SE (right graph) levels of wildtype (WT)  
991 and *bsc2Δ* yeast, measured by TLC. Experiments conducted in triplicate. Statistical  
992 analysis is Unpaired t test with Welch's correction. **(B)** Graphical schematic of cerulenin  
993 lipolysis assay for yeast. **(C, left panel)** TLC quantification of STAT phase, pre-lipolysis  
994 ( $T_0$ ) TG levels of WT, *bsc2Δ*, *tgl3Δ*, and *bsc2Δ tgl3Δ*. **(C, right panel)** Rate of lipolysis  
995 determined via TLC after addition of 10μg/μL cerulenin ( $T_3$ ) for these same strains.  
996 Quantification represents percentage of starting TG remaining (pre-cerulenin TG levels  
997 set to 100% for each strain) after 3hrs of cerulenin-stimulated lipolysis. Experiments  
998 conducted in triplicate. Statistical analyses are ordinary one-way ANOVA. **(D, left**  
999 **panel)** TLC quantification of STAT phase, pre-lipolysis TG levels of WT, *bsc2Δ*,  
1000 *tgl3Δ tgl4Δ tgl5Δ*, and *bsc2Δ tgl3Δ tgl4Δ tgl5Δ*. **(D, right panel)** Rate of lipolysis  
1001 determined via TLC after addition of 10μg/μL cerulenin for these same strains.  
1002 Quantification represents percentage of starting TG remaining (pre-cerulenin TG levels  
1003 set to 100% for each strain) after 3hrs of cerulenin-stimulated lipolysis. Experiments  
1004 conducted in triplicate. Statistical analyses are ordinary one-way ANOVA. **(E)** Time-  
1005 lapse imaging of galactose-induced LD formation in WT <sup>GAL</sup>DGA1 and *bsc2Δ* <sup>GAL</sup>DGA1  
1006 yeast stained with MDH. Scale bar 2μm. **(F)** Representative TLC plate of galactose-  
1007 induced TG production in WT <sup>GAL</sup>DGA1 and *bsc2Δ* <sup>GAL</sup>DGA1 yeast strains. FFA = Free  
1008 Fatty Acids, ERG = Ergosterol, DG = Diacylglyceride. **(G)** TLC quantification of TG  
1009 levels after galactose-induced TG production time-course in WT <sup>GAL</sup>DGA1 and *bsc2Δ*  
1010 <sup>GAL</sup>DGA1. Representative of three independent experiments. Statistical analyses are  
1011 multiple unpaired t tests with Welch's correction. **(H)** TLC quantification of FFA levels  
1012 after galactose-induced TG production time-course in WT <sup>GAL</sup>DGA1 and *bsc2Δ*  
1013 <sup>GAL</sup>DGA1. Representative of three independent experiments. Statistical analyses are  
1014 multiple unpaired t tests with Welch's correction. **(I)** LOG phase imaging of endogenous  
1015 WT full-length Bsc2-GFP ( $Bsc2^{FL}$ -GFP) and truncated Bsc2 with GFP inserted after  
1016 HR2 ( $Bsc2^{N-HR1+HR2}$ -GFP), with MDH stained LDs. Scale bar 5μm. **(J, left panel)** TLC  
1017 quantification of STAT phase, pre-lipolysis TG levels of  $Bsc2^{FL}$ -GFP, *bsc2Δ*, and  $Bsc2^{N-}$   
1018  $HR1+HR2$ -GFP. **(J, right panel)** Rate of lipolysis determined via TLC after addition of  
1019 10μg/μL cerulenin for these same strains. Quantification represents percentage of  
1020 starting TG remaining (pre-cerulenin TG levels set to 100% for each strain) after 3hrs of

1021 cerulenin-stimulated lipolysis. Experiments conducted in triplicate. Statistical analyses  
1022 are ordinary one-way ANOVA. \*,  $P < 0.05$ ; \*\*,  $P < 0.01$ ; \*\*\*,  $P < 0.001$ ; \*\*\*\*,  $P < 0.0001$ .

1023  
1024 **Figure 5. Overexpression of Bsc2 significantly elevates TG levels, LD number and**  
1025 **LD size. (A)** Steady state, LOG phase, TG (left panel) and SE (right panel) levels in  
1026 empty vector plus soluble GFP (EV) and Bsc2-mNeonGreen overexpressing (Bsc2 OE)  
1027 yeast as quantified by TLC. Data were compiled from three independent experiments.  
1028 **(B)** Thin-section TEM micrographs of LOG phase EV and Bsc2 OE yeast. LD = Lipid  
1029 Droplet, N = Nucleus, V = Vacuole. **(C)** LD number quantification from Fig 5B  
1030 micrographs.  $n = 44$  cells for EV and  $n = 18$  cells for Bsc2 OE. **(D)** LD area  
1031 quantification from Fig 5B micrographs.  $n = 98$  LDs for EV and  $n = 115$  LDs for Bsc2  
1032 OE. **(E)** Steady state TG (left panel) and SE (right panel) levels at LOG for EV, Bsc2  
1033 OE, and Pln1 overexpressing (Pln1 OE) yeast. Experiments were performed in  
1034 triplicate. **(F)** Protein expression of Bsc2-mNeonGreen and Pln1-mNeonGreen  
1035 overexpressing constructs used in Fig 5E. Membranes blotted with anti-mNeonGreen  
1036 antibody and Ponceau S stain served as loading control for total protein. Scale bars, 0.5  
1037  $\mu\text{m}$ . Statistics for Fig 5A, C, and D were unpaired t test with Welch's correction.  
1038 Statistics for Fig 5E was ordinary one-way ANOVA. \*,  $P < 0.05$ ; \*\*\*,  $P < 0.001$ ; \*\*\*\*,  $P <$   
1039 0.0001.

1040  
1041 **Figure 6. Bsc2 does not alter TG lipase LD-targeting or protein abundance, but**  
1042 **modulates lipolysis on the LD. (A, C)** Fluorescence imaging of GFP-tagged TG  
1043 lipases in either WT and *bsc2* $\Delta$  (A) or EV and untagged Bsc2 OE yeast (C). LDs were  
1044 stained with MDH. **(B, D)** Protein expression levels of GFP-tagged TG lipases in WT  
1045 and *bsc2* $\Delta$  (B) and EV and Bsc2 OE (D). Red asterisks indicated GFP-tagged lipases.  
1046 Data is normalized to WT or EV, respectively, and represents three independent  
1047 experiments. **(E)** Fluorescence imaging of Bsc2-GFP and Tgl3-mRuby dual-tagged  
1048 yeast, with MDH stained LDs before ( $T_0$ ) and 3hrs after cerulenin-stimulated lipolysis  
1049 ( $T_3$ ). Green arrows indicate Bsc2-enriched LDs, red arrows indicate Tgl3-enriched LDs,  
1050 and yellow arrows indicate LDs targeted with both Bsc2 and Tgl3. Second from left  
1051 column represents non-contrast adjusted images for Tgl3-mRuby. **(F)** Scatterplot of

1052 Bsc2-GFP fluorescence signal intensity versus Tgl3-mRuby signal intensity for random  
1053 LDs before ( $T_0$ ) and after 3hrs cerulenin treatment ( $T_3$ ) with Pearson's correlation  
1054 coefficient ( $r$ ) displayed. Data corresponding to images in Fig 6E. Red circles indicate  
1055 Tgl3-enriched/Bsc2-deenriched LDs.  $n = 120$  LDs for each condition, quantified from 87  
1056 cells for  $T_0$  and 105 cells for  $T_3$ . **(G)** Volcano plot showing negative  $\text{Log}_{10}$  P value ( $-\text{Log}_{10}$ ) and  $\text{Log}_2$  abundance changes for Bsc2 IP interactors versus EV control, obtained  
1057 via mass spec analysis. Red text at select data points indicates LD proteins found to  
1058 directly interact with Bsc2. Red dotted line indicates significance cut-off for protein hits.  
1059 Data were collected from three independent experiments. Statistical analyses are  
1060 multiple unpaired t tests. Scale bars are  $5\mu\text{m}$ . ns,  $\geq 0.05$ .

1062

1063 **Figure 7. Bsc2 influences LD maintenance during late starvation conditions.**

1064 **(A)** Imaging of MDH-stained WT and *bsc2* $\Delta$  yeast LDs, before (Day 0) and after (Day 6)  
1065 exposure to late STAT phase, also known as Gradual Glucose Restriction (GGR). Blue  
1066 circles indicate cell borders. **(B)** Quantification of LD number per cell at Day 0 and Day  
1067 6 of exposure to GGR, from images in Fig 7A.  $n = 150$  cells for both WT and *bsc2* $\Delta$ ,  
1068 each. **(C)** Cartoon model of Bsc2 negative regulation of Tgl3-dependent TG lipolysis via  
1069 competition for TG substrate binding or direct interaction (WT LD, left). In the absence  
1070 of Bsc2, TG is more accessible to Tgl3 lipase (*bsc2* $\Delta$  LD, right). Statistics are unpaired t  
1071 test with Welch's correction. Scale bars,  $5\mu\text{m}$ . \*\*,  $P < 0.01$ ; \*\*\*\*,  $P < 0.0001$ .

1072

1073 **Figure Supplements:**

1074 **Figure Supplement 3: MD analysis of Bsc2 HR1 and HR2 conformations.** **(A)** The  
1075 angle of HR2 over time in simulation. **(B)** Schematic of HR2 helix-kink-helix region. The  
1076 coordinates of the angle were taken between the endpoints (residues 61 and 100) and  
1077 the kink (residue 78). The predicted/initial angle was 100 degrees. **(C)** The predicted  
1078 structure of Bsc2 N+HR1+HR2 through RoseTTAFold. **(D)** Average depths from of  
1079 residues 60-99 (sidechains) below the PL phosphate plane in the TG-rich LD and ER  
1080 bilayer. Focusing on the polar residues, the average depth of the residue's COM is  
1081 significantly deeper in the TG-LD **(E)** than in the **(F)** ER bilayer. **(G)** The free energy  
1082 profile for membrane permeation shows the stability of GLN and SER  $\sim 1\text{nm}$  below the

1083 phosphate plane just under the headgroups (dark green regions) and unfavorable  
1084 penalty for pulling them ~2 nm below the plane into the PL tail region (light green  
1085 region). **(H)** HR1 sequence interacting with the bilayer (top) and TG-LD (bottom). **(I)** In  
1086 the ER bilayer, these contacts are all PL-tail interactions. **(J)** In the TG-LD system, there  
1087 is a combination of PL-tail and TG defects interactions. **(K)** In the SE-rich 90:10  
1088 CHYO:TG LD, the interactions rarely occur as there are too few packing defects. **(L)**  
1089 The probability of each residue interacting with a TG molecule through the entire  
1090 simulation. The HR2 sequence is almost in constant contact with TG molecules. **(M)**  
1091 TOPCONS prediction of transmembrane segments (grey and white bars), which  
1092 correspond to the HR2 helices.

1093

#### 1094 **References:**

- 1095 Abraham, M.J., T. Murtola, R. Schulz, S. Páll, J.C. Smith, B. Hess, and E. Lindahl. 2015.  
1096 GROMACS: High performance molecular simulations through multi-level parallelism  
1097 from laptops to supercomputers. *SoftwareX*. 1–2:19–25.  
1098 doi:10.1016/j.softx.2015.06.001.
- 1099 Athenstaedt, K., and G. Daum. 2003. YMR313c/TGL3 Encodes a Novel Triacylglycerol Lipase  
1100 Located in Lipid Particles of *Saccharomyces cerevisiae*. *J. Biol. Chem.* 278:23317–23323.  
1101 doi:10.1074/jbc.M302577200.
- 1102 Athenstaedt, K., and G. Daum. 2005. Tgl4p and Tgl5p, Two Triacylglycerol Lipases of the Yeast  
1103 *Saccharomyces cerevisiae* Are Localized to Lipid Particles. *J. Biol. Chem.* 280:37301–  
1104 37309. doi:10.1074/jbc.M507261200.
- 1105 Athenstaedt, K., D. Zweytick, A. Jandrositz, S.D. Kohlwein, and G. Daum. 1999. Identification and  
1106 Characterization of Major Lipid Particle Proteins of the Yeast *Saccharomyces cerevisiae*.  
1107 *J. Bacteriol.* 181:6441–6448. doi:10.1128/JB.181.20.6441-6448.1999.
- 1108 Azzaz, F., N. Yahi, H. Chahinian, and J. Fantini. 2022. The Epigenetic Dimension of Protein  
1109 Structure Is an Intrinsic Weakness of the AlphaFold Program. *Biomolecules*. 12:1527.  
1110 doi:10.3390/biom12101527.
- 1111 Bacle, A., R. Gautier, C.L. Jackson, P.F.J. Fuchs, and S. Vanni. 2017. Interdigitation between  
1112 Triglycerides and Lipids Modulates Surface Properties of Lipid Droplets. *Biophys. J.*  
1113 112:1417–1430. doi:10.1016/j.bpj.2017.02.032.
- 1114 Baek, M., F. DiMaio, I. Anishchenko, J. Dauparas, S. Ovchinnikov, G.R. Lee, J. Wang, Q. Cong,  
1115 L.N. Kinch, R.D. Schaeffer, C. Millán, H. Park, C. Adams, C.R. Glassman, A. DeGiovanni,  
1116 J.H. Pereira, A.V. Rodrigues, A.A. van Dijk, A.C. Ebrecht, D.J. Opperman, T. Sagmeister, C.



- 1117 Buhlheller, T. Pavkov-Keller, M.K. Rathinaswamy, U. Dalwadi, C.K. Yip, J.E. Burke, K.C.  
1118 Garcia, N.V. Grishin, P.D. Adams, R.J. Read, and D. Baker. 2021. Accurate prediction of  
1119 protein structures and interactions using a three-track neural network. *Science*.  
1120 373:871–876. doi:10.1126/science.abj8754.
- 1121 Barducci, A., G. Bussi, and M. Parrinello. 2008. Well-Tempered Metadynamics: A Smoothly  
1122 Converging and Tunable Free-Energy Method. *Phys. Rev. Lett.* 100:020603.  
1123 doi:10.1103/PhysRevLett.100.020603.
- 1124 Bersuker, K., C.W.H. Peterson, M. To, S.J. Sahl, V. Savikhin, E.A. Grossman, D.K. Nomura, and  
1125 J.A. Olzmann. 2018. A Proximity Labeling Strategy Provides Insights into the Composition  
1126 and Dynamics of Lipid Droplet Proteomes. *Dev. Cell.* 44:97-112.e7.  
1127 doi:10.1016/j.devcel.2017.11.020.
- 1128 Braun, R.J., and J.M.J. Swanson. 2022. Capturing the Liquid-Crystalline Phase Transformation:  
1129 Implications for Protein Targeting to Sterol Ester-Rich Lipid Droplets. *Membranes*.  
1130 12:949. doi:10.3390/membranes12100949.
- 1131 Caillon, L., V. Nieto, P. Gehan, M. Omrane, N. Rodriguez, L. Monticelli, and A.R. Thiam. 2020.  
1132 Triacylglycerols sequester monotopic membrane proteins to lipid droplets. *Nat.*  
1133 *Commun.* 11:3944. doi:10.1038/s41467-020-17585-8.
- 1134 Campomanes, P., J. Prabhu, V. Zoni, and S. Vanni. 2021. Recharging your fats: CHARMM36  
1135 parameters for neutral lipids triacylglycerol and diacylglycerol. *Biophys. Rep.* 1:None.  
1136 doi:10.1016/j.bpr.2021.100034.
- 1137 Cartwright, B.R., D.D. Binns, C.L. Hilton, S. Han, Q. Gao, and J.M. Goodman. 2015. Seipin  
1138 performs dissectible functions in promoting lipid droplet biogenesis and regulating  
1139 droplet morphology. *Mol. Biol. Cell.* 26:726–739. doi:10.1091/mbc.E14-08-1303.
- 1140 Chorlay, A., L. Forêt, and A.R. Thiam. 2021. Origin of gradients in lipid density and surface  
1141 tension between connected lipid droplet and bilayer. *Biophys. J.* 120:5491–5503.  
1142 doi:10.1016/j.bpj.2021.11.022.
- 1143 Chorlay, A., and A.R. Thiam. 2020. Neutral lipids regulate amphipathic helix affinity for model  
1144 lipid droplets. *J. Cell Biol.* 219:e201907099. doi:10.1083/jcb.201907099.
- 1145 Currie, E., X. Guo, R. Christiano, C. Chitraju, N. Kory, K. Harrison, J. Haas, T.C. Walther, and R.V.  
1146 Farese. 2014. High confidence proteomic analysis of yeast LDs identifies additional  
1147 droplet proteins and reveals connections to dolichol synthesis and sterol acetylation. *J.*  
1148 *Lipid Res.* 55:1465–1477. doi:10.1194/jlr.M050229.
- 1149 DeCaprio, J., and T.O. Kohl. 2020. Lysing Yeast Cells with Glass Beads for Immunoprecipitation.  
1150 *Cold Spring Harb. Protoc.* 2020:pdb.prot098590. doi:10.1101/pdb.prot098590.

- 1151 Dhiman, R., S. Caesar, A.R. Thiam, and B. Schrul. 2020. Mechanisms of protein targeting to lipid  
1152 droplets: A unified cell biological and biophysical perspective. *Semin. Cell Dev. Biol.*  
1153 108:4–13. doi:10.1016/j.semcdb.2020.03.004.
- 1154 Dobson, L., L.I. Szekeres, C. Gerdán, T. Langó, A. Zeke, and G.E. Tusnády. 2023. TmAlphaFold  
1155 database: membrane localization and evaluation of AlphaFold2 predicted alpha-helical  
1156 transmembrane protein structures. *Nucleic Acids Res.* 51:D517–D522.  
1157 doi:10.1093/nar/gkac928.
- 1158 Duncan, R.E., M. Ahmadian, K. Jaworski, E. Sarkadi-Nagy, and H.S. Sul. 2007. Regulation of  
1159 Lipolysis in Adipocytes. *Annu. Rev. Nutr.* 27:79–101.  
1160 doi:10.1146/annurev.nutr.27.061406.093734.
- 1161 Eisenberg-Bord, M., M. Mari, U. Weill, E. Rosenfeld-Gur, O. Moldavski, I.G. Castro, K.G. Soni, N.  
1162 Harpaz, T.P. Levine, A.H. Futerman, F. Reggiori, V.A. Bankaitis, M. Schuldiner, and M.  
1163 Bohnert. 2018. Identification of seipin-linked factors that act as determinants of a lipid  
1164 droplet subpopulation. *J. Cell Biol.* 217:269–282. doi:10.1083/jcb.201704122.
- 1165 Essmann, U., L. Perera, M.L. Berkowitz, T. Darden, H. Lee, and L.G. Pedersen. 1995. A smooth  
1166 particle mesh Ewald method. *J. Chem. Phys.* 103:8577–8593. doi:10.1063/1.470117.
- 1167 Gao, Q., D.D. Binns, L.N. Kinch, N.V. Grishin, N. Ortiz, X. Chen, and J.M. Goodman. 2017. Pet10p  
1168 is a yeast perilipin that stabilizes lipid droplets and promotes their assembly. *J. Cell Biol.*  
1169 216:3199–3217. doi:10.1083/jcb.201610013.
- 1170 Gautier, R., D. Douguet, B. Antonny, and G. Drin. 2008. HELIQUEST: a web server to screen  
1171 sequences with specific  $\alpha$ -helical properties. *Bioinformatics.* 24:2101–2102.  
1172 doi:10.1093/bioinformatics/btn392.
- 1173 Gluchowski, N.L., M. Becuwe, T.C. Walther, and R.V. Farese. 2017. Lipid droplets and liver  
1174 disease: from basic biology to clinical implications. *Nat. Rev. Gastroenterol. Hepatol.*  
1175 14:343–355. doi:10.1038/nrgastro.2017.32.
- 1176 Gowers, R., M. Linke, J. Barnoud, T. Reddy, M. Melo, S. Seyler, J. Domański, D. Dotson, S.  
1177 Buchoux, I. Kenney, and O. Beckstein. 2016. MDAnalysis: A Python Package for the Rapid  
1178 Analysis of Molecular Dynamics Simulations. Austin, Texas. 98–105.
- 1179 Grillitsch, K., M. Connerth, H. Köfeler, T.N. Arrey, B. Rietschel, B. Wagner, M. Karas, and G.  
1180 Daum. 2011. Lipid particles/droplets of the yeast *Saccharomyces cerevisiae* revisited:  
1181 Lipidome meets Proteome. *Biochim. Biophys. Acta BBA - Mol. Cell Biol. Lipids.*  
1182 1811:1165–1176. doi:10.1016/j.bbalip.2011.07.015.
- 1183 Hariri, H., S. Rogers, R. Ugrankar, Y.L. Liu, J.R. Feathers, and W.M. Henne. 2018. Lipid droplet  
1184 biogenesis is spatially coordinated at ER–vacuole contacts under nutritional stress.  
1185 *EMBO Rep.* 19:57–72. doi:10.15252/embr.201744815.

- 1186 Hegedűs, T., M. Geisler, G.L. Lukács, and B. Farkas. 2022. Ins and outs of AlphaFold2  
1187 transmembrane protein structure predictions. *Cell. Mol. Life Sci.* 79:73.  
1188 doi:10.1007/s00018-021-04112-1.
- 1189 Heier, C., and R.P. Kühnlein. 2018. Triacylglycerol Metabolism in *Drosophila melanogaster*.  
1190 *Genetics*. 210:1163–1184. doi:10.1534/genetics.118.301583.
- 1191 Hess, B. 2008. P-LINCS: A Parallel Linear Constraint Solver for Molecular Simulation. *J. Chem.*  
1192 *Theory Comput.* 4:116–122. doi:10.1021/ct700200b.
- 1193 Hoover, W.G. 1985. Canonical dynamics: Equilibrium phase-space distributions. *Phys. Rev. A*.  
1194 31:1695–1697. doi:10.1103/PhysRevA.31.1695.
- 1195 Humphrey, W., A. Dalke, and K. Schulten. 1996. VMD: visual molecular dynamics. *J. Mol. Graph.*  
1196 14:33–38, 27–28. doi:10.1016/0263-7855(96)00018-5.
- 1197 Jo, S., T. Kim, V.G. Iyer, and W. Im. 2008. CHARMM-GUI: A web-based graphical user interface  
1198 for CHARMM. *J. Comput. Chem.* 29:1859–1865. doi:10.1002/jcc.20945.
- 1199 Jumper, J., R. Evans, A. Pritzel, T. Green, M. Figurnov, O. Ronneberger, K. Tunyasuvunakool, R.  
1200 Bates, A. Židek, A. Potapenko, A. Bridgland, C. Meyer, S.A.A. Kohl, A.J. Ballard, A. Cowie,  
1201 B. Romera-Paredes, S. Nikolov, R. Jain, J. Adler, T. Back, S. Petersen, D. Reiman, E.  
1202 Clancy, M. Zielinski, M. Steinegger, M. Pacholska, T. Berghammer, S. Bodenstein, D.  
1203 Silver, O. Vinyals, A.W. Senior, K. Kavukcuoglu, P. Kohli, and D. Hassabis. 2021. Highly  
1204 accurate protein structure prediction with AlphaFold. *Nature*. 596:583–589.  
1205 doi:10.1038/s41586-021-03819-2.
- 1206 Käll, L., A. Krogh, and E.L.L. Sonnhammer. 2004. A Combined Transmembrane Topology and  
1207 Signal Peptide Prediction Method. *J. Mol. Biol.* 338:1027–1036.  
1208 doi:10.1016/j.jmb.2004.03.016.
- 1209 Kim, S., M.I. Oh, and J.M.J. Swanson. 2021. Stressed Lipid Droplets: How Neutral Lipids Relieve  
1210 Surface Tension and Membrane Expansion Drives Protein Association. *J. Phys. Chem. B*.  
1211 125:5572–5586. doi:10.1021/acs.jpcc.1c01795.
- 1212 Klauda, J.B., R.M. Venable, J.A. Freites, J.W. O'Connor, D.J. Tobias, C. Mondragon-Ramirez, I.  
1213 Vorobyov, A.D. MacKerell, and R.W. Pastor. 2010. Update of the CHARMM All-Atom  
1214 Additive Force Field for Lipids: Validation on Six Lipid Types. *J. Phys. Chem. B*. 114:7830–  
1215 7843. doi:10.1021/jp101759q.
- 1216 Klein, I., L. Klug, C. Schmidt, M. Zandl, M. Korber, G. Daum, and K. Athenstaedt. 2016.  
1217 Regulation of the yeast triacylglycerol lipases Tgl4p and Tgl5p by the presence/absence  
1218 of nonpolar lipids. *Mol. Biol. Cell*. 27:2014–2024. doi:10.1091/mbc.E15-09-0633.

- 1219 Koch, B., C. Schmidt, B. Ploier, and G. Daum. 2014. Modifications of the C terminus Affect  
1220 Functionality and Stability of Yeast Triacylglycerol Lipase Tgl3p. *J. Biol. Chem.*  
1221 289:19306–19316. doi:10.1074/jbc.M114.556944.
- 1222 Kory, N., A.-R. Thiam, R.V. Farese, and T.C. Walther. 2015. Protein Crowding Is a Determinant of  
1223 Lipid Droplet Protein Composition. *Dev. Cell.* 34:351–363.  
1224 doi:10.1016/j.devcel.2015.06.007.
- 1225 Kurat, C.F., K. Natter, J. Petschnigg, H. Wolinski, K. Scheuringer, H. Scholz, R. Zimmermann, R.  
1226 Leber, R. Zechner, and S.D. Kohlwein. 2006. Obese Yeast: Triglyceride Lipolysis Is  
1227 Functionally Conserved from Mammals to Yeast. *J. Biol. Chem.* 281:491–500.  
1228 doi:10.1074/jbc.M508414200.
- 1229 Laemmli, U.K. 1970. Cleavage of Structural Proteins during the Assembly of the Head of  
1230 Bacteriophage T4. *Nature.* 227:680–685. doi:10.1038/227680a0.
- 1231 Li, Z., K. Thiel, P.J. Thul, M. Beller, R.P. Kühnlein, and M.A. Welte. 2012. Lipid Droplets Control  
1232 the Maternal Histone Supply of Drosophila Embryos. *Curr. Biol.* 22:2104–2113.  
1233 doi:10.1016/j.cub.2012.09.018.
- 1234 Müllner, H., D. Zweytick, R. Leber, F. Turnowsky, and G. Daum. 2004. Targeting of proteins  
1235 involved in sterol biosynthesis to lipid particles of the yeast *Saccharomyces cerevisiae*.  
1236 *Biochim. Biophys. Acta BBA - Biomembr.* 1663:9–13.  
1237 doi:10.1016/j.bbamem.2004.03.001.
- 1238 Nosé, S. 1984. A unified formulation of the constant temperature molecular dynamics methods.  
1239 *J. Chem. Phys.* 81:511–519. doi:10.1063/1.447334.
- 1240 Parrinello, M., and A. Rahman. 1981. Polymorphic transitions in single crystals: A new molecular  
1241 dynamics method. *J. Appl. Phys.* 52:7182–7190. doi:10.1063/1.328693.
- 1242 Prévost, C., M.E. Sharp, N. Kory, Q. Lin, G.A. Voth, R.V. Farese, and T.C. Walther. 2018.  
1243 Mechanism and Determinants of Amphipathic Helix-Containing Protein Targeting to  
1244 Lipid Droplets. *Dev. Cell.* 44:73-86.e4. doi:10.1016/j.devcel.2017.12.011.
- 1245 Ren, J., C. Pei-Chen Lin, M.C. Pathak, B.R.S. Temple, A.H. Nile, C.J. Mousley, M.C. Duncan, D.M.  
1246 Eckert, T.J. Leiker, P.T. Ivanova, D.S. Myers, R.C. Murphy, H.A. Brown, J. Verdaasdonk,  
1247 K.S. Bloom, E.A. Ortlund, A.M. Neiman, and V.A. Bankaitis. 2014. A phosphatidylinositol  
1248 transfer protein integrates phosphoinositide signaling with lipid droplet metabolism to  
1249 regulate a developmental program of nutrient stress–induced membrane biogenesis.  
1250 *Mol. Biol. Cell.* 25:712–727. doi:10.1091/mbc.e13-11-0634.
- 1251 Rogers, S., L. Gui, A. Kovalenko, V. Zoni, M. Carpentier, K. Ramji, K. Ben Mbarek, A. Bacle, P.  
1252 Fuchs, P. Campomanes, E. Reetz, N.O. Speer, E. Reynolds, A.R. Thiam, S. Vanni, D.  
1253 Nicastro, and W.M. Henne. 2022. Triglyceride lipolysis triggers liquid crystalline phases

- 1254 in lipid droplets and alters the LD proteome. *J. Cell Biol.* 221:e202205053.  
1255 doi:10.1083/jcb.202205053.
- 1256 Sandager, L., M.H. Gustavsson, U. Ståhl, A. Dahlqvist, E. Wiberg, A. Banas, M. Lenman, H.  
1257 Ronne, and S. Stymne. 2002. Storage Lipid Synthesis Is Non-essential in Yeast. *J. Biol.*  
1258 *Chem.* 277:6478–6482. doi:10.1074/jbc.M109109200.
- 1259 Schmeisser, S., S. Li, B. Bouchard, M. Ruiz, C. Des Rosiers, and R. Roy. 2019. Muscle-Specific  
1260 Lipid Hydrolysis Prolongs Lifespan through Global Lipidomic Remodeling. *Cell Rep.*  
1261 29:4540-4552.e8. doi:10.1016/j.celrep.2019.11.090.
- 1262 Schmidt, C., K. Athenstaedt, B. Koch, B. Ploier, and G. Daum. 2013. Regulation of the Yeast  
1263 Triacylglycerol Lipase Tgl3p by Formation of Nonpolar Lipids. *J. Biol. Chem.* 288:19939–  
1264 19948. doi:10.1074/jbc.M113.459610.
- 1265 Schmidt, C., K. Athenstaedt, B. Koch, B. Ploier, M. Korber, G. Zellnig, and G. Daum. 2014.  
1266 Defects in triacylglycerol lipolysis affect synthesis of triacylglycerols and steryl esters in  
1267 the yeast. *Biochim. Biophys. Acta BBA - Mol. Cell Biol. Lipids.* 1841:1393–1402.  
1268 doi:10.1016/j.bbalip.2014.07.001.
- 1269 Schott, M.B., S.G. Weller, R.J. Schulze, E.W. Krueger, K. Drizyte-Miller, C.A. Casey, and M.A.  
1270 McNiven. 2019. Lipid droplet size directs lipolysis and lipophagy catabolism in  
1271 hepatocytes. *J. Cell Biol.* 218:3320–3335. doi:10.1083/jcb.201803153.
- 1272 Shaw, D.E., J.P. Grossman, J.A. Bank, B. Batson, J.A. Butts, J.C. Chao, M.M. Deneroff, R.O. Dror,  
1273 A. Even, C.H. Fenton, A. Forte, J. Gagliardo, G. Gill, B. Greskamp, C.R. Ho, D.J. Ierardi, L.  
1274 Iserovich, J.S. Kuskin, R.H. Larson, T. Layman, L.-S. Lee, A.K. Lerer, C. Li, D. Killebrew,  
1275 K.M. Mackenzie, S.Y.-H. Mok, M.A. Moraes, R. Mueller, L.J. Nociolo, J.L. Peticolas, T.  
1276 Quan, D. Ramot, J.K. Salmon, D.P. Scarpazza, U.B. Schafer, N. Siddique, C.W. Snyder, J.  
1277 Spengler, P.T.P. Tang, M. Theobald, H. Toma, B. Towles, B. Vitale, S.C. Wang, and C.  
1278 Young. 2014. Anton 2: Raising the Bar for Performance and Programmability in a  
1279 Special-Purpose Molecular Dynamics Supercomputer. *In* SC14: International Conference  
1280 for High Performance Computing, Networking, Storage and Analysis. IEEE, New Orleans,  
1281 LA, USA. 41–53.
- 1282 Sorger, D., K. Athenstaedt, C. Hrastnik, and G. Daum. 2004. A Yeast Strain Lacking Lipid Particles  
1283 Bears a Defect in Ergosterol Formation. *J. Biol. Chem.* 279:31190–31196.  
1284 doi:10.1074/jbc.M403251200.
- 1285 Strande, S., H. Cai, M. Tatineni, W. Pfeiffer, C. Irving, A. Majumdar, D. Mishin, R. Sinkovits, M.  
1286 Norman, N. Wolter, T. Cooper, I. Altintas, M. Kandes, I. Perez, M. Shantharam, M.  
1287 Thomas, S. Sivagnanam, and T. Hutton. 2021. Expanse: Computing without Boundaries:  
1288 Architecture, Deployment, and Early Operations Experiences of a Supercomputer  
1289 Designed for the Rapid Evolution in Science and Engineering. *In* Practice and Experience  
1290 in Advanced Research Computing. ACM, Boston MA USA. 1–4.

- 1291 Teixeira, V., L. Johnsen, F. Martínez-Montañés, A. Grippa, L. Buxó, F.-Z. Idrissi, C.S. Ejsing, and P.  
1292 Carvalho. 2018. Regulation of lipid droplets by metabolically controlled Ldo isoforms. *J.*  
1293 *Cell Biol.* 217:127–138. doi:10.1083/jcb.201704115.
- 1294 Thiam, A.R., and M. Beller. 2017. The why, when and how of lipid droplet diversity. *J. Cell Sci.*  
1295 *jcs.192021.* doi:10.1242/jcs.192021.
- 1296 Tribello, G.A., M. Bonomi, D. Branduardi, C. Camilloni, and G. Bussi. 2014. PLUMED 2: New  
1297 feathers for an old bird. *Comput. Phys. Commun.* 185:604–613.  
1298 doi:10.1016/j.cpc.2013.09.018.
- 1299 Tsirigos, K.D., C. Peters, N. Shu, L. Käll, and A. Elofsson. 2015. The TOPCONS web server for  
1300 consensus prediction of membrane protein topology and signal peptides. *Nucleic Acids*  
1301 *Res.* 43:W401–W407. doi:10.1093/nar/gkv485.
- 1302 Ugrankar, R., J. Bowerman, H. Hariri, M. Chandra, K. Chen, M.-F. Bossanyi, S. Datta, S. Rogers,  
1303 K.M. Eckert, G. Vale, A. Victoria, J. Fresquez, J.G. McDonald, S. Jean, B.M. Collins, and  
1304 W.M. Henne. 2019. Drosophila Snazarus Regulates a Lipid Droplet Population at Plasma  
1305 Membrane-Droplet Contacts in Adipocytes. *Dev. Cell.* 50:557-572.e5.  
1306 doi:10.1016/j.devcel.2019.07.021.
- 1307 Walther, T.C., J. Chung, and R.V. Farese. 2017. Lipid Droplet Biogenesis. *Annu. Rev. Cell Dev.*  
1308 *Biol.* 33:491–510. doi:10.1146/annurev-cellbio-100616-060608.
- 1309 Wang, H., M. Becuwe, B.E. Housden, C. Chitraju, A.J. Porras, M.M. Graham, X.N. Liu, A.R. Thiam,  
1310 D.B. Savage, A.K. Agarwal, A. Garg, M.-J. Olarte, Q. Lin, F. Fröhlich, H.K. Hannibal-Bach, S.  
1311 Upadhyayula, N. Perrimon, T. Kirchhausen, C.S. Ejsing, T.C. Walther, and R.V. Farese.  
1312 2016. Seipin is required for converting nascent to mature lipid droplets. *eLife.* 5:e16582.  
1313 doi:10.7554/eLife.16582.
- 1314 Welte, M.A. 2015. Expanding Roles for Lipid Droplets. *Curr. Biol.* 25:R470–R481.  
1315 doi:10.1016/j.cub.2015.04.004.
- 1316 Wilfling, F., H. Wang, J.T. Haas, N. Kraher, T.J. Gould, A. Uchida, J.-X. Cheng, M. Graham, R.  
1317 Christiano, F. Fröhlich, X. Liu, K.K. Buhman, R.A. Coleman, J. Bewersdorf, R.V. Farese, and  
1318 T.C. Walther. 2013. Triacylglycerol Synthesis Enzymes Mediate Lipid Droplet Growth by  
1319 Relocalizing from the ER to Lipid Droplets. *Dev. Cell.* 24:384–399.  
1320 doi:10.1016/j.devcel.2013.01.013.
- 1321 Wright, R. 2000. Transmission electron microscopy of yeast. *Microsc. Res. Tech.* 51:496–510.  
1322 doi:10.1002/1097-0029(20001215)51:6<496::AID-JEMT2>3.0.CO;2-9.
- 1323 Zhang, S., Y. Wang, L. Cui, Y. Deng, S. Xu, J. Yu, S. Cichello, G. Serrero, Y. Ying, and P. Liu. 2016.  
1324 Morphologically and Functionally Distinct Lipid Droplet Subpopulations. *Sci. Rep.*  
1325 6:29539. doi:10.1038/srep29539.



1326

**A**

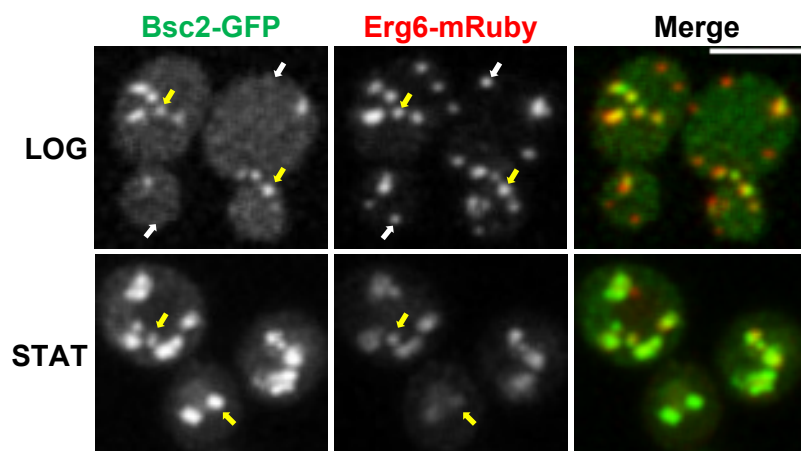

**B**

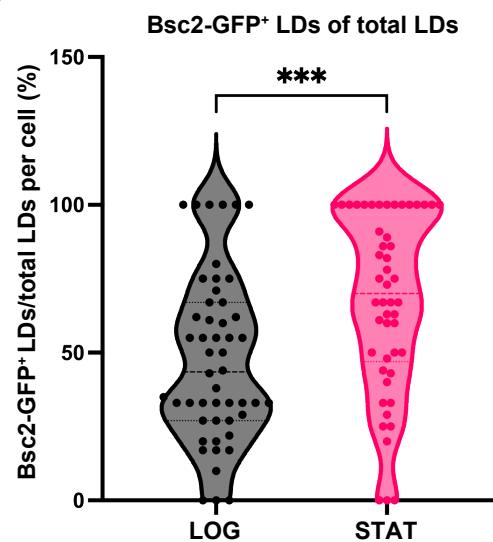

**C**

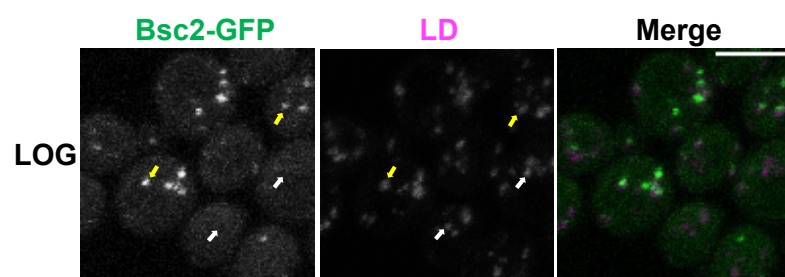

**D**

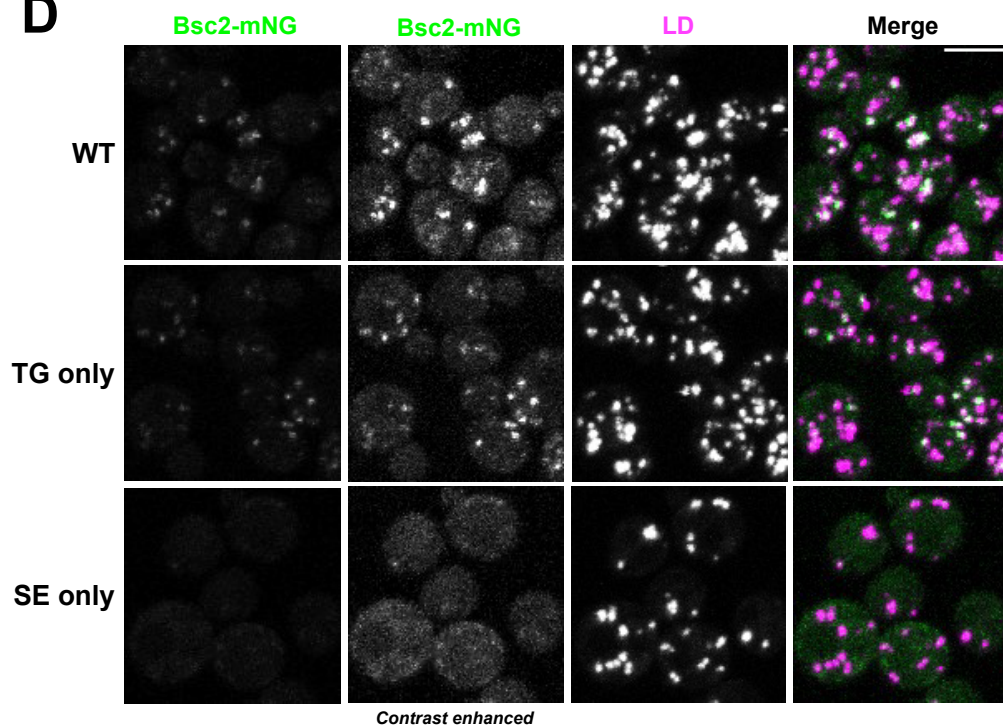

**Figure 1**

**A**

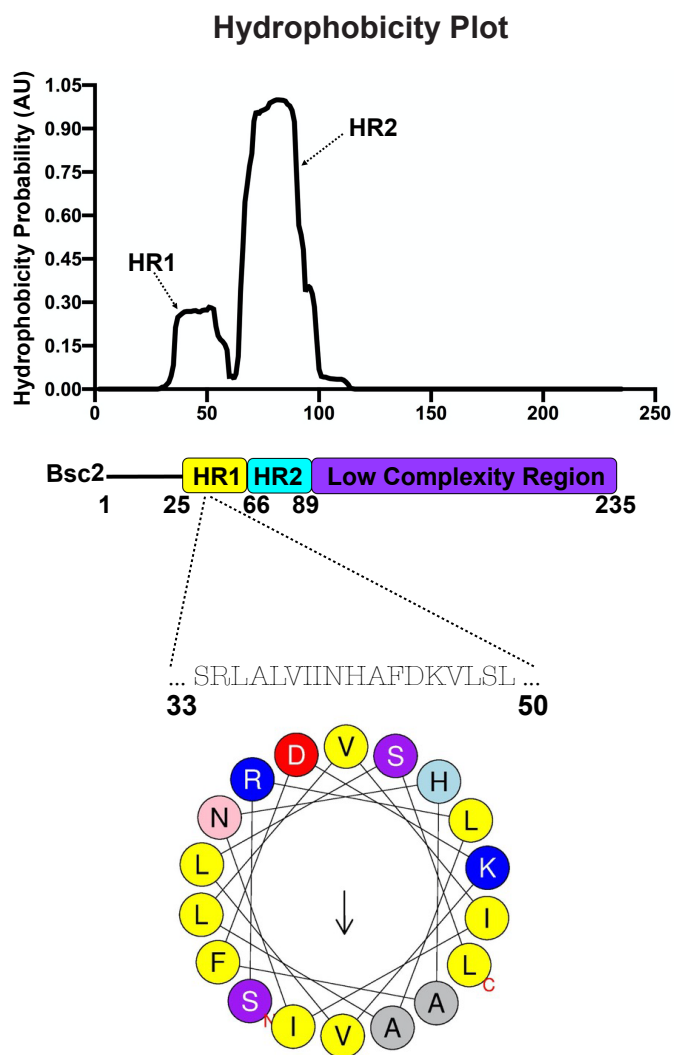

**B**

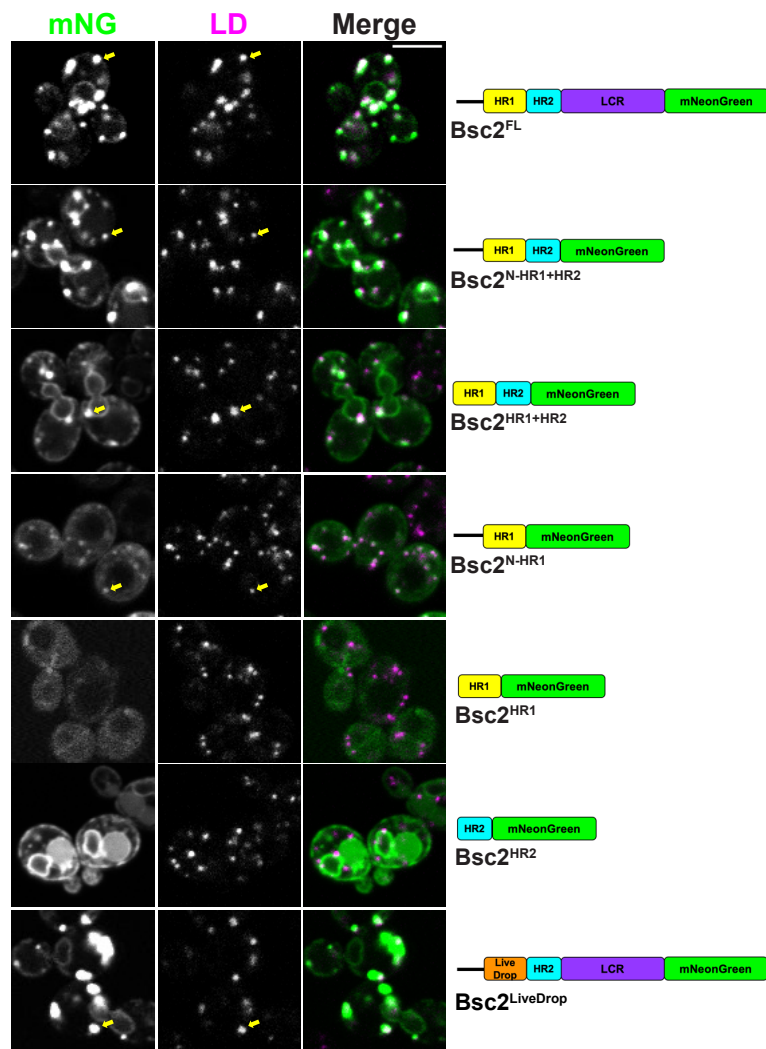

**C**

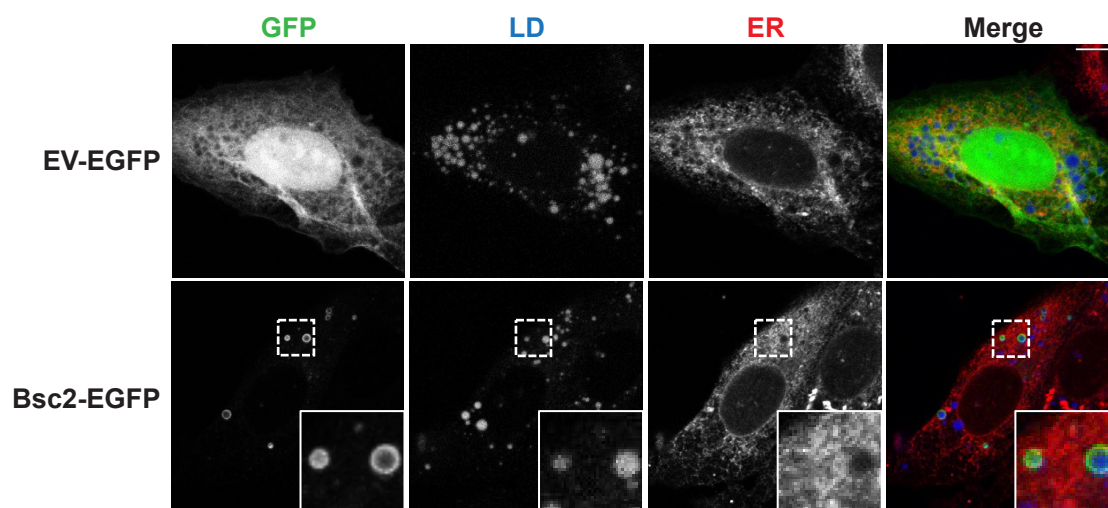

**Figure 2**

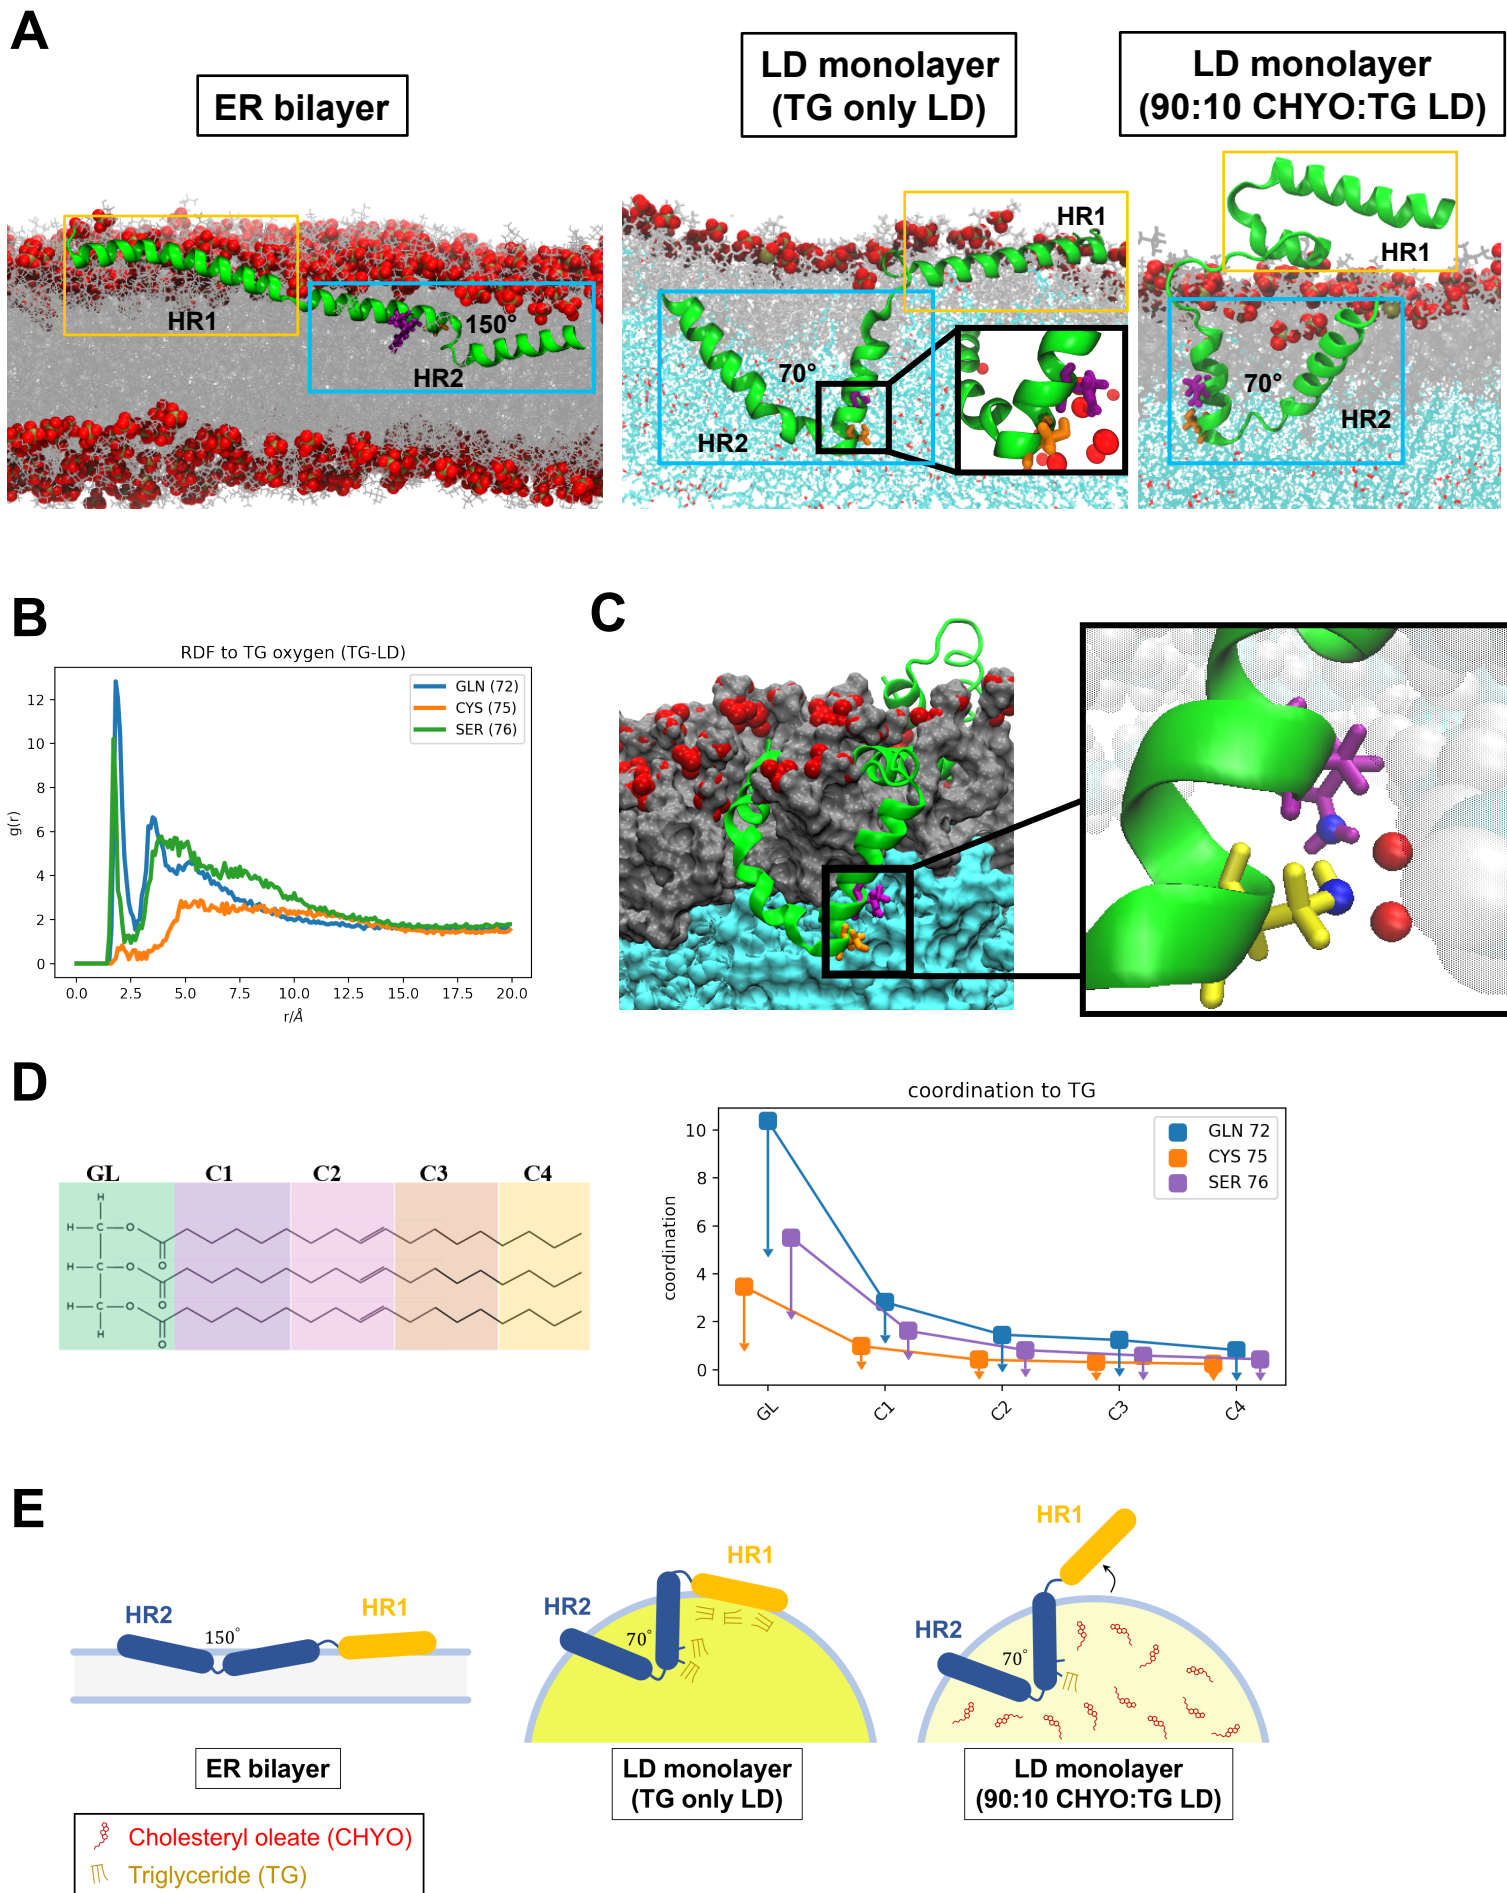

**Figure 3**



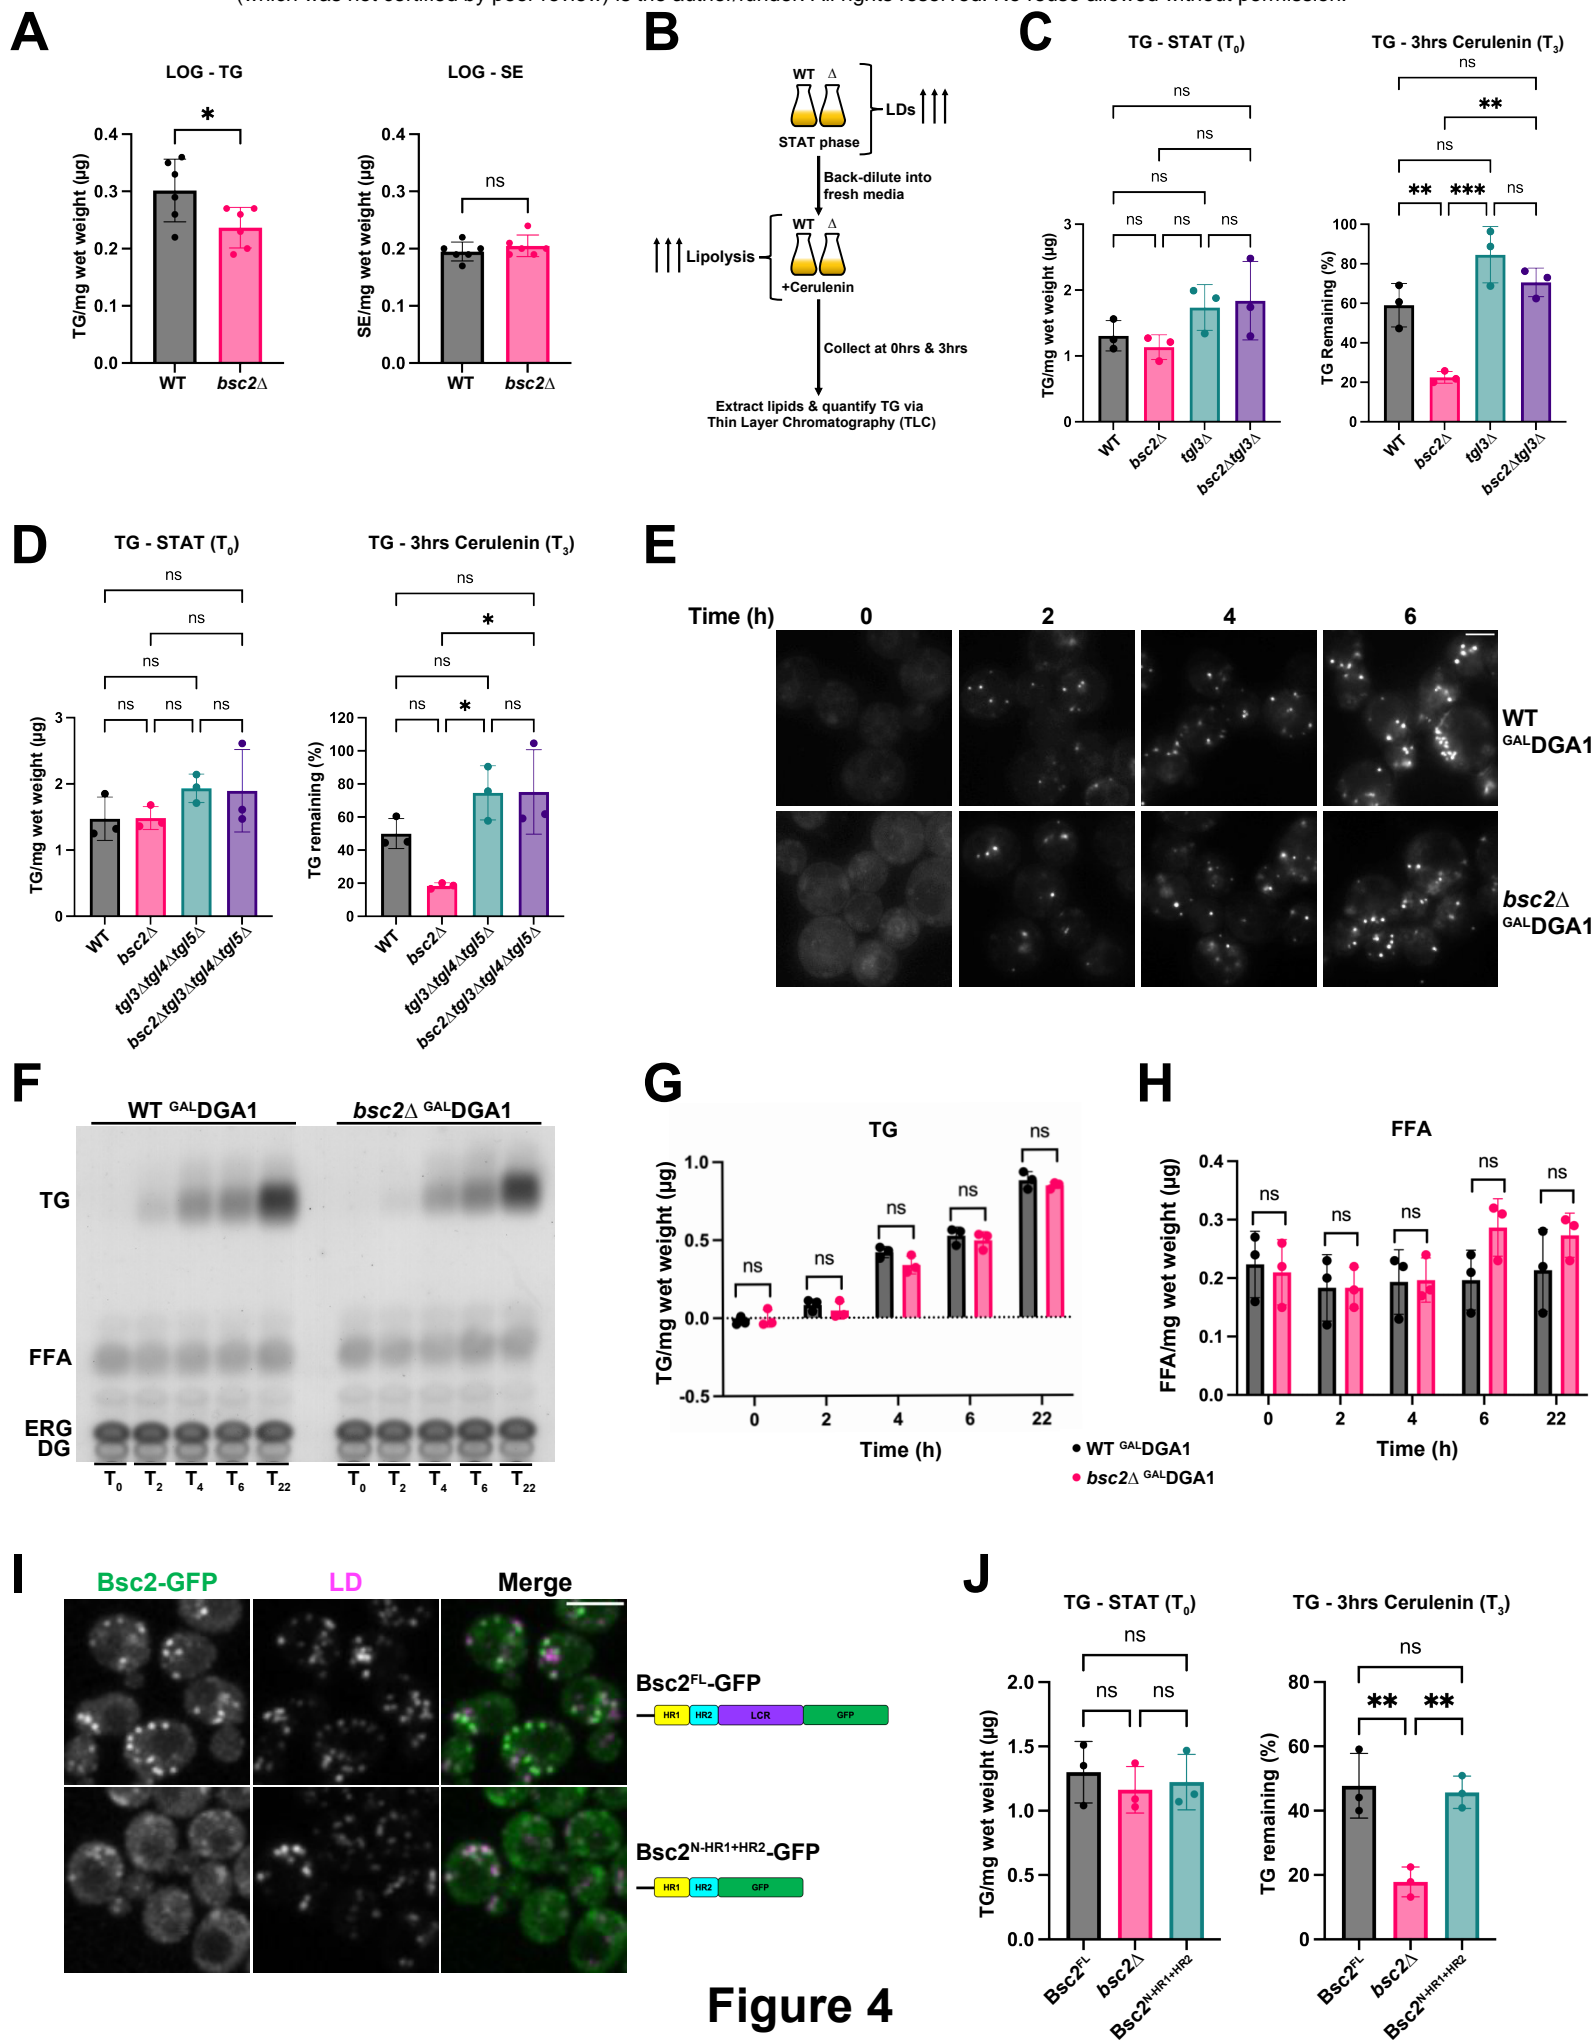

Figure 4

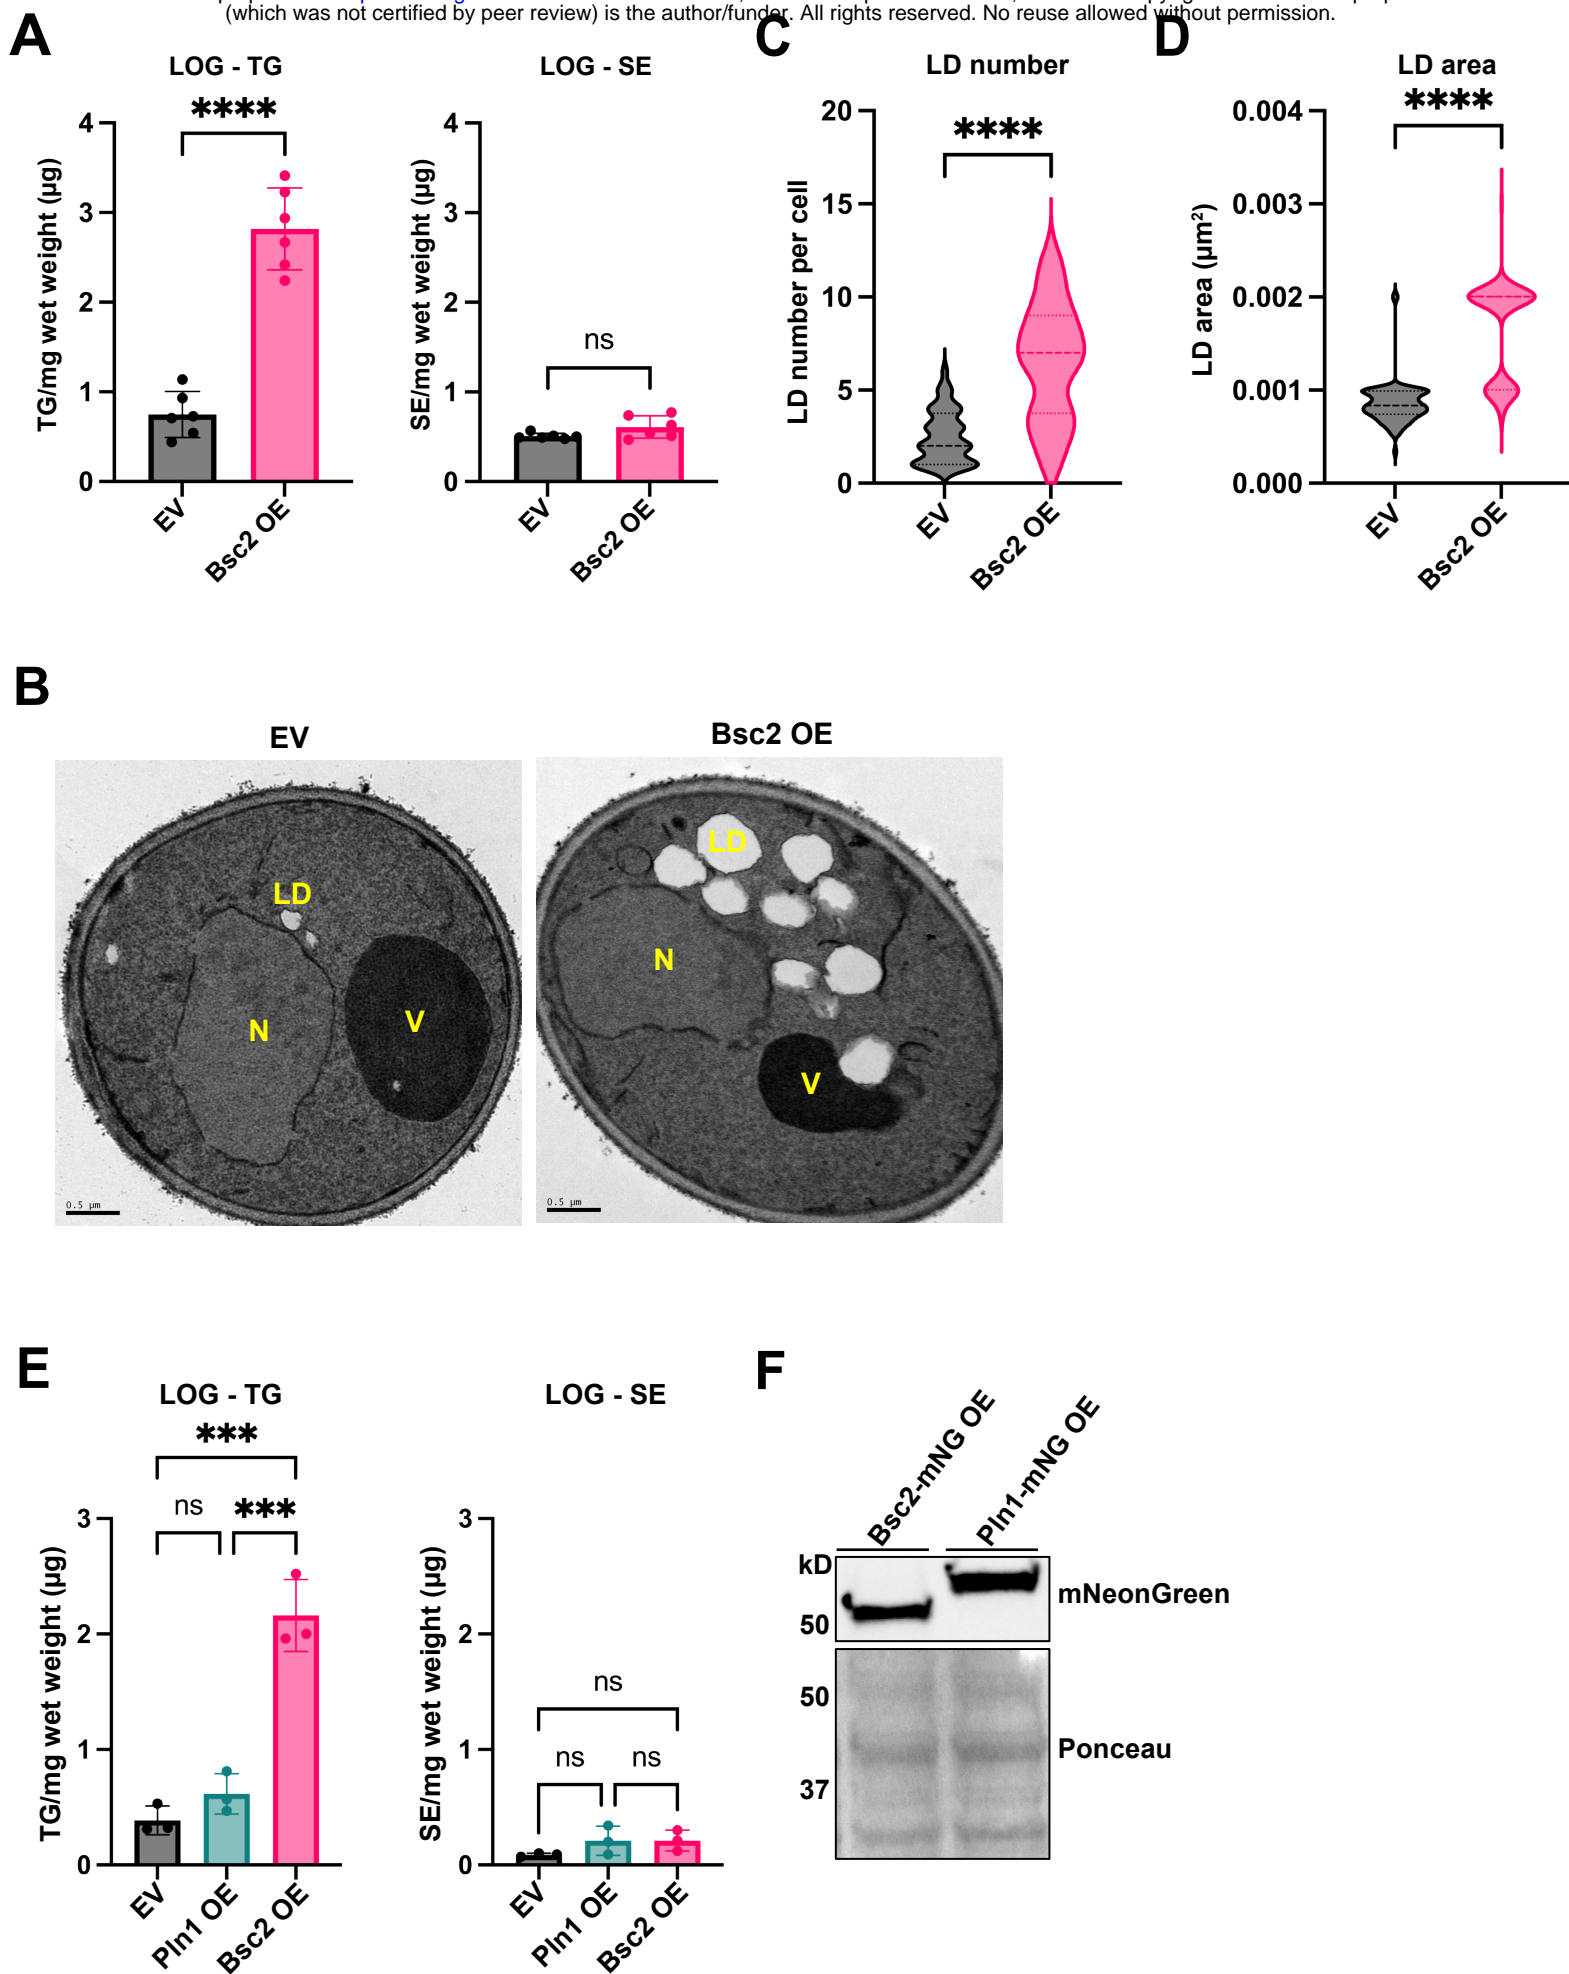

Figure 5



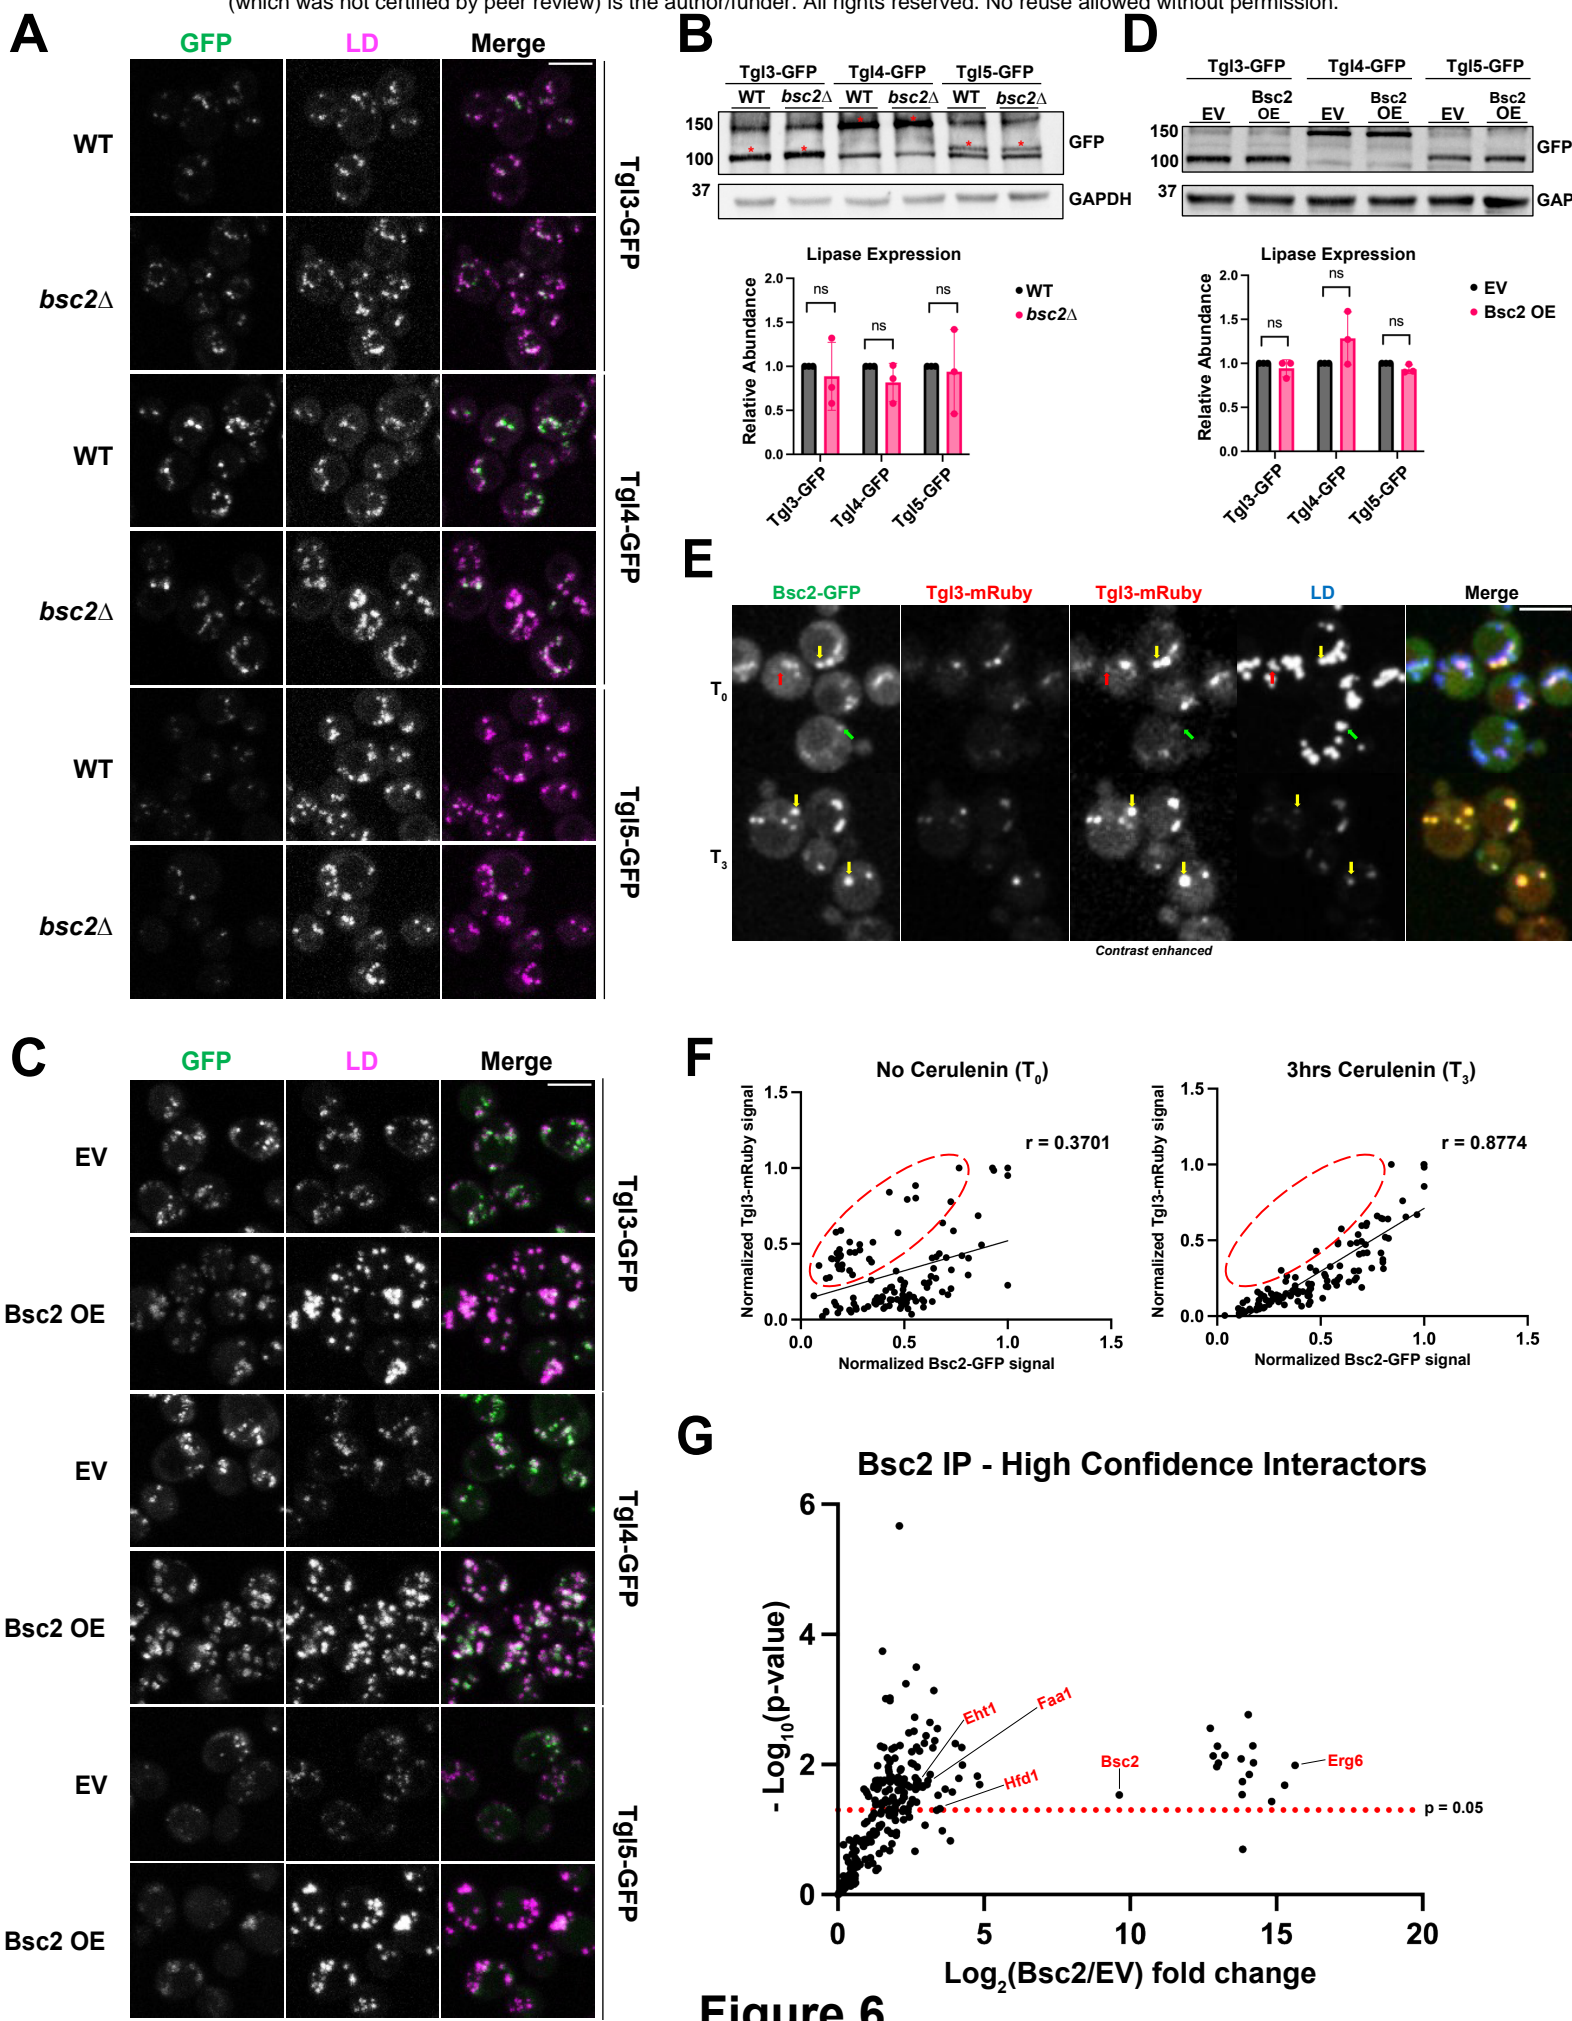

**A**

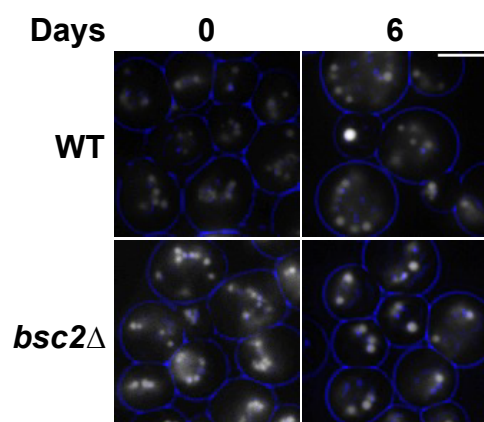

**B**

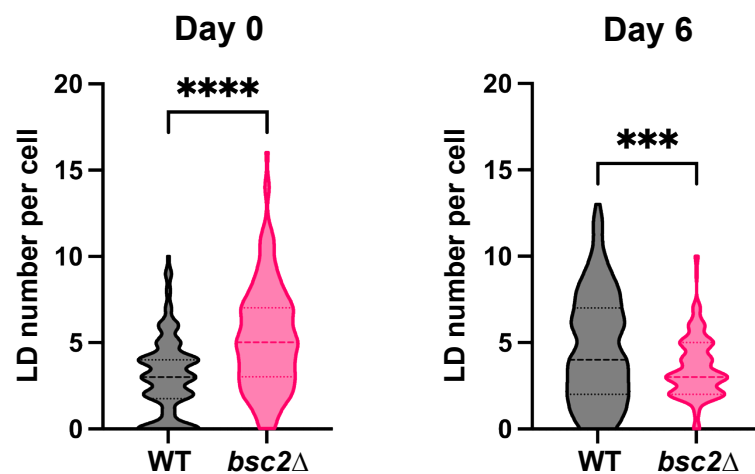

**C**

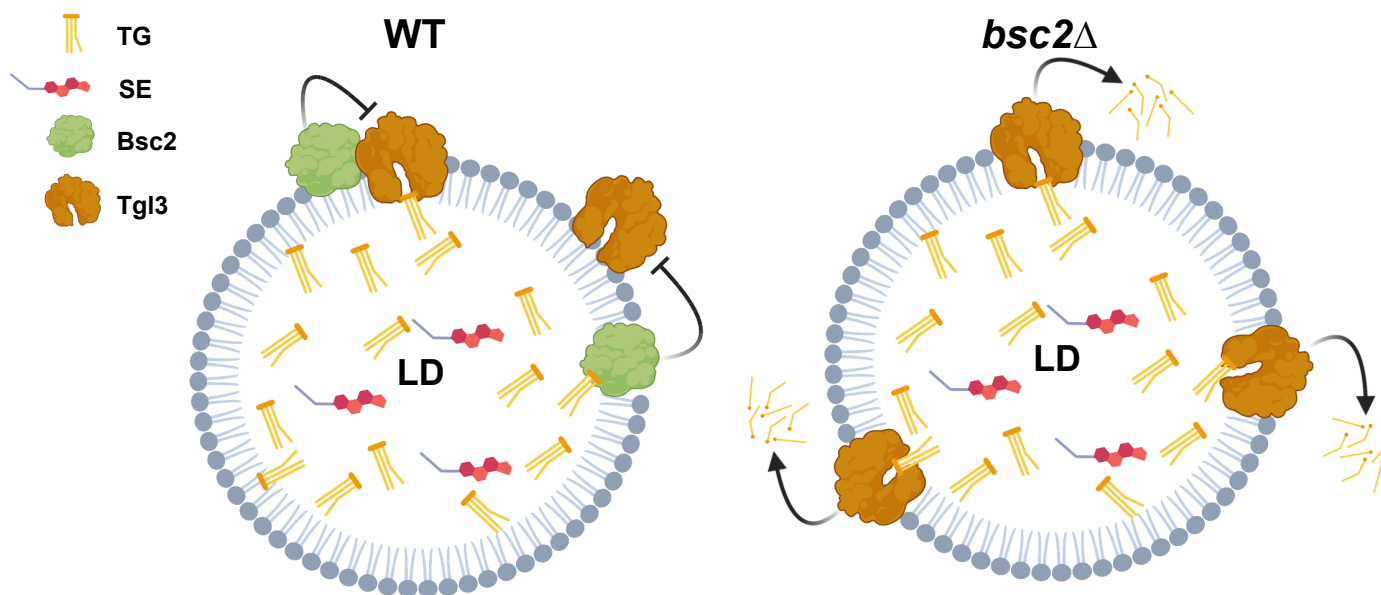

**Figure 7**

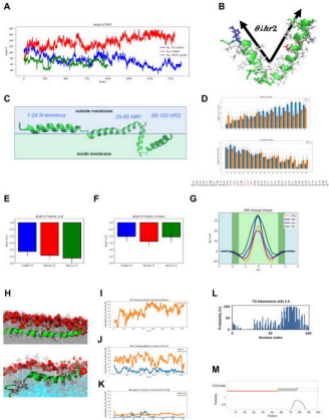

Figure S3
